# Supplementary material for: Study of the Genetic Expression of Antiretroviral Restriction Factors and Acute Phase Proteins in Cattle Infected with Bovine Leukemia Virus
Source: MDPI journal article supplement (doi:10.3390/pathogens12040529), 2023-03-29

# a. S1 Lymphocyte by group

$\chi^2_{\text{Kruskal-Wallis}}(2) = 18.86, p = 8.03\text{e-}05, \hat{\epsilon}^2_{\text{ordinal}} = 0.59, \text{CI}_{99\%} [0.44, 1.00], n_{\text{obs}} = 33$

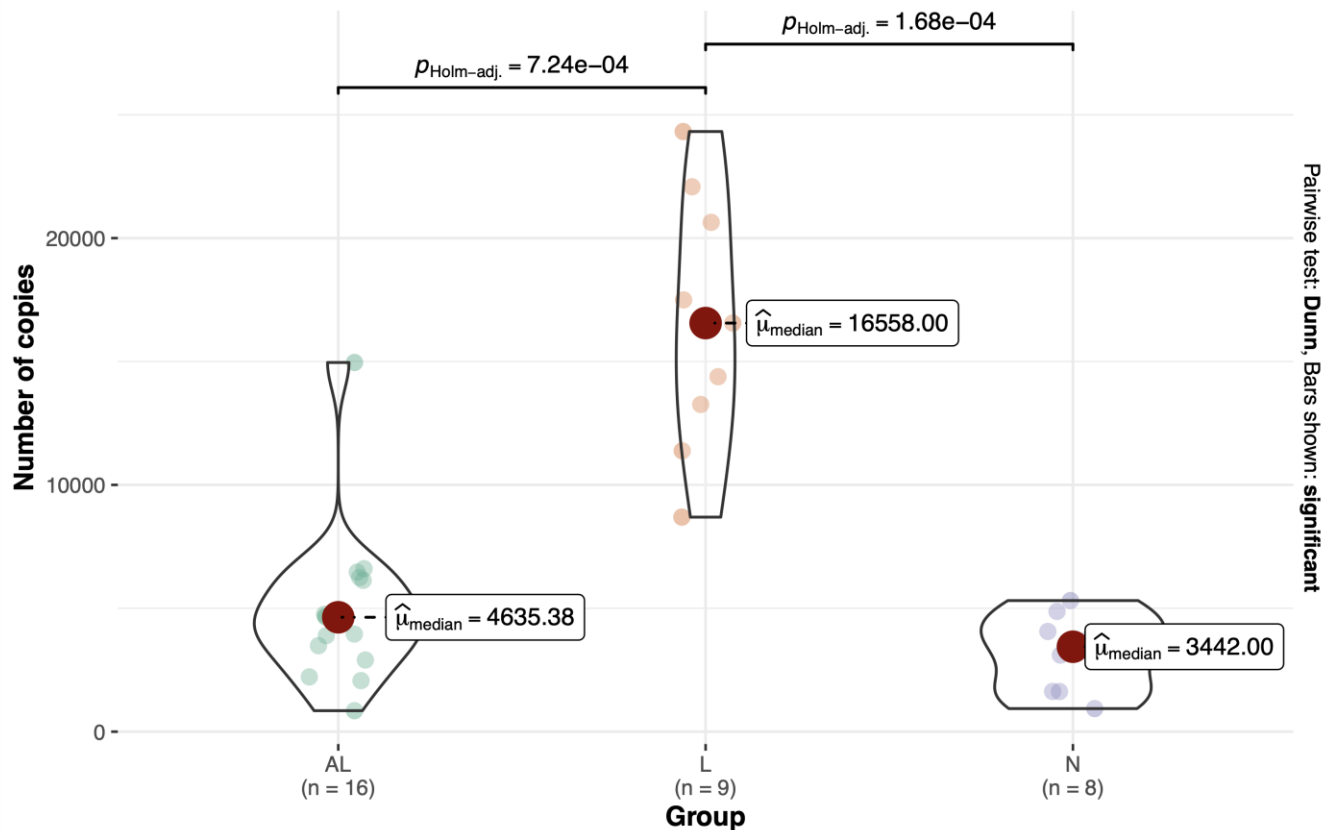

S3  $\chi^2_{\text{Kruskal-Wallis}}(2) = 23.47, p = 8.02\text{e-}06, \hat{\epsilon}^2_{\text{ordinal}} = 0.69, \text{CI}_{99\%} [0.58, 1.00], n_{\text{obs}} = 35$

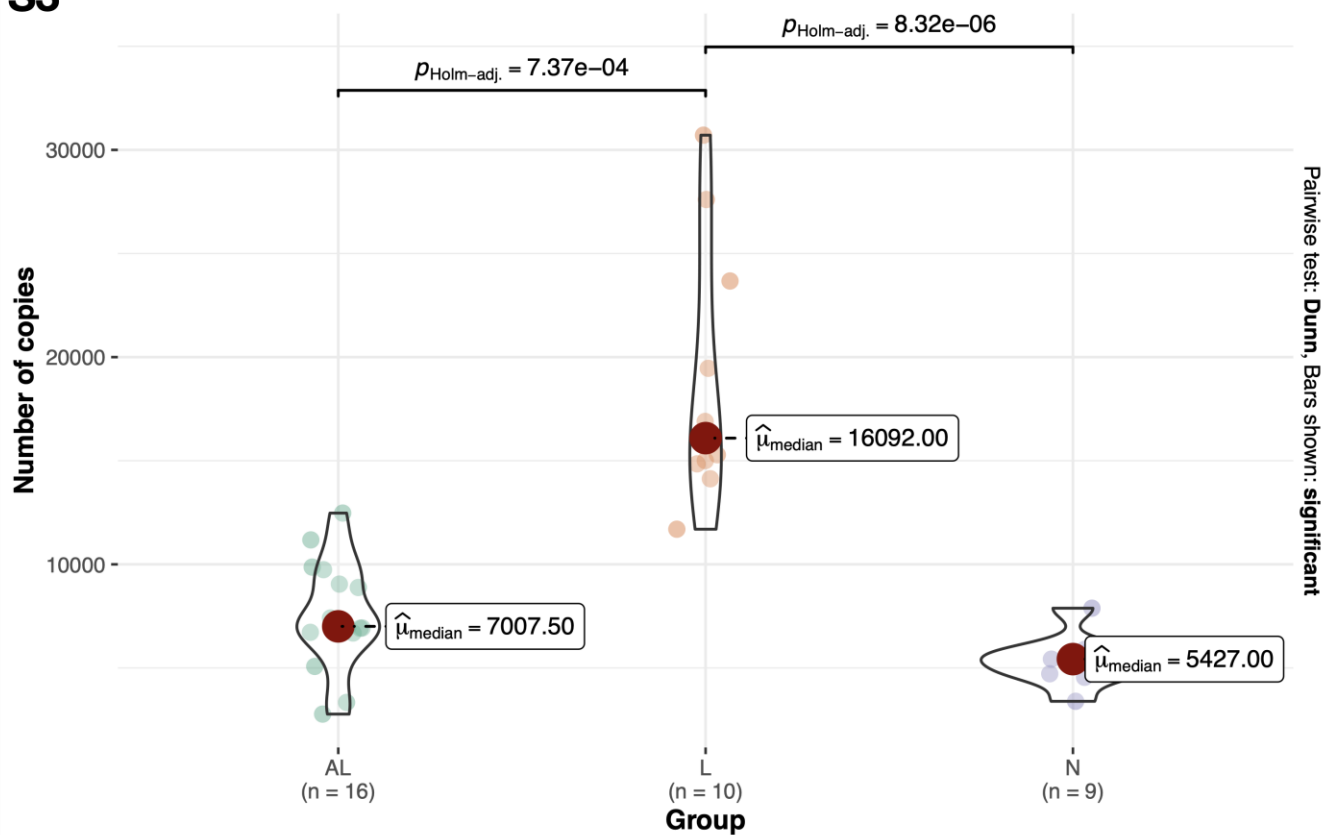

**b.****S1****Viral load by group** $\chi^2_{\text{Kruskal-Wallis}}(2) = 7.21, p = 0.03, \hat{\epsilon}^2_{\text{ordinal}} = 0.23, \text{CI}_{99\%} [0.05, 1.00], n_{\text{obs}} = 33$ 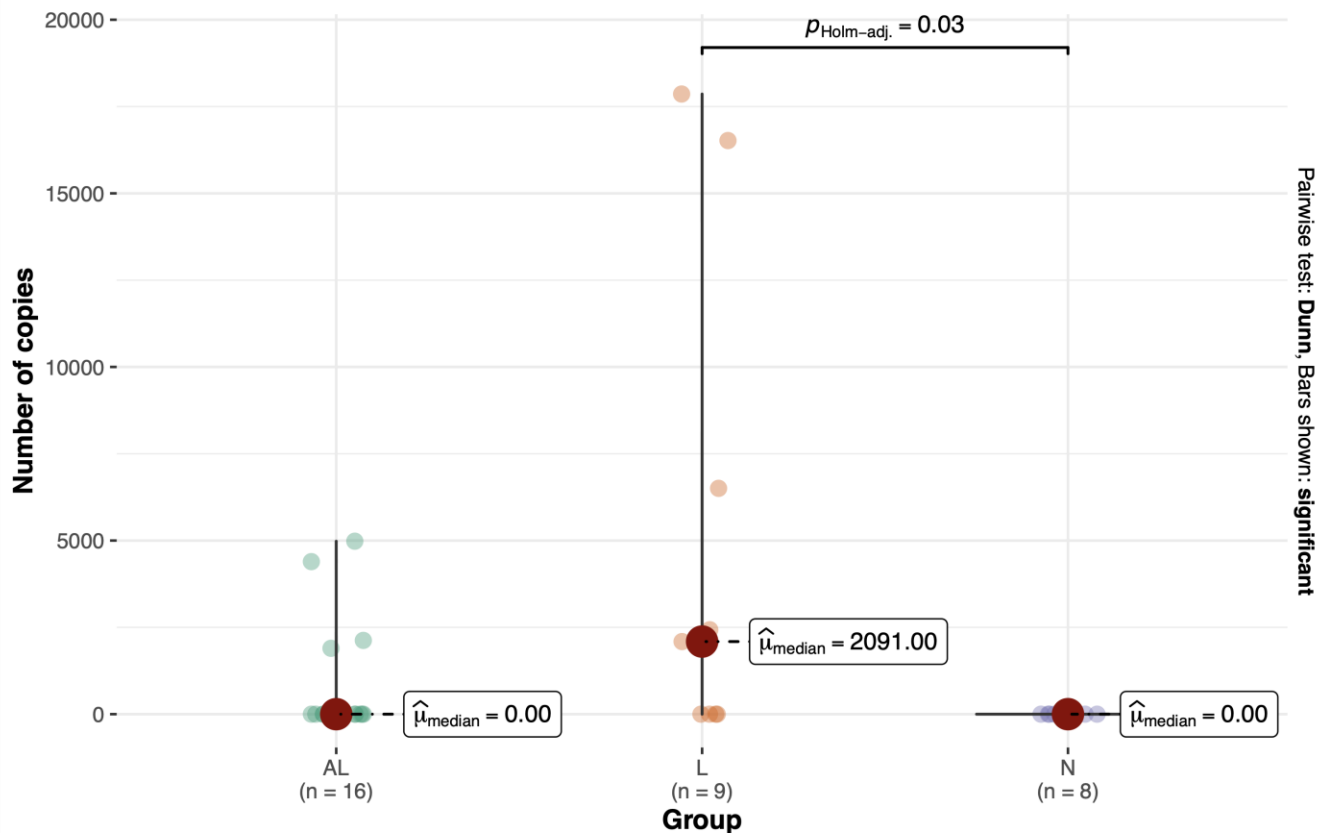**S3** $\chi^2_{\text{Kruskal-Wallis}}(2) = 20.65, p = 3.27\text{e-}05, \hat{\epsilon}^2_{\text{ordinal}} = 0.61, \text{CI}_{99\%} [0.40, 1.00], n_{\text{obs}} = 35$ 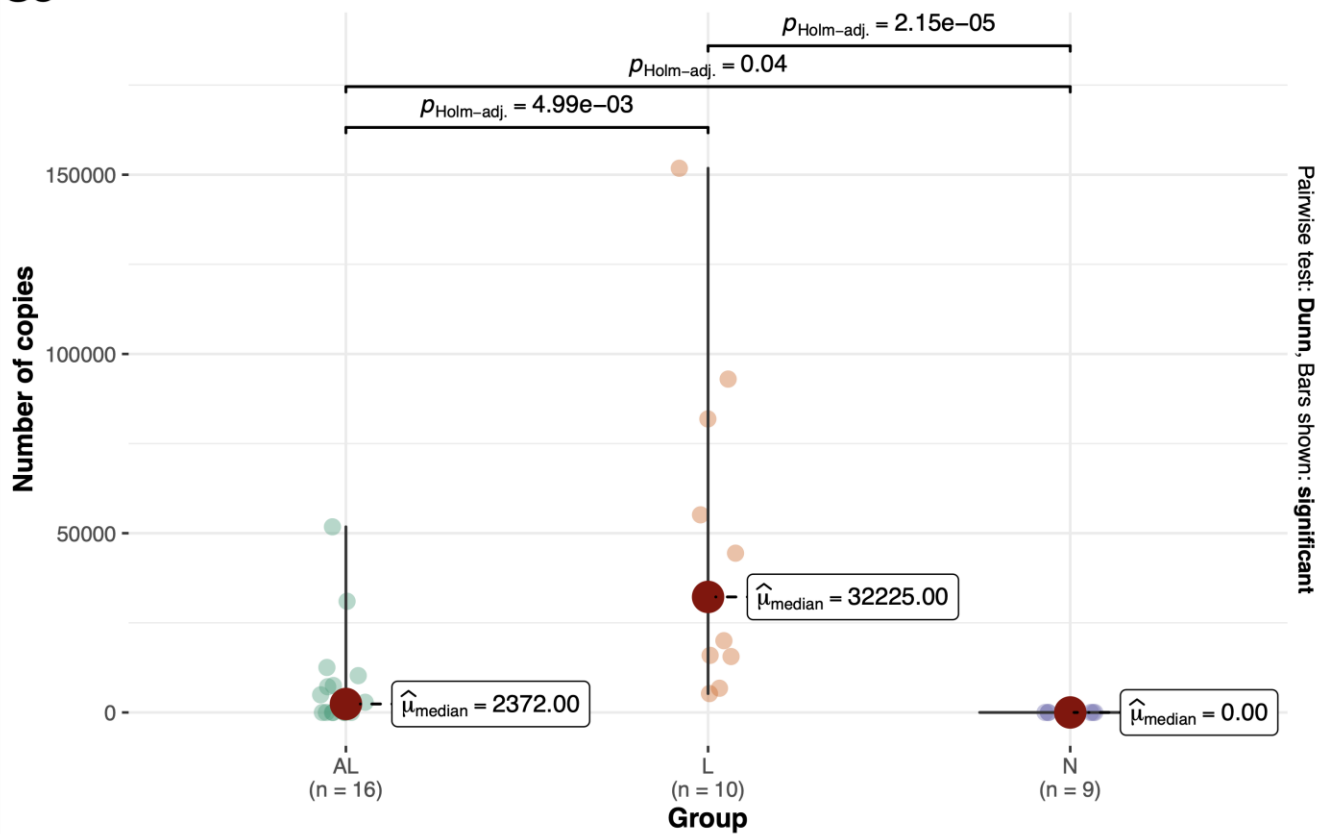

C. S1 Proviral load by group

$\chi^2_{\text{Kruskal-Wallis}}(2) = 21.38, p = 2.28\text{e-}05, \hat{\epsilon}^2_{\text{ordinal}} = 0.67, \text{CI}_{99\%} [0.58, 1.00], n_{\text{obs}} = 33$

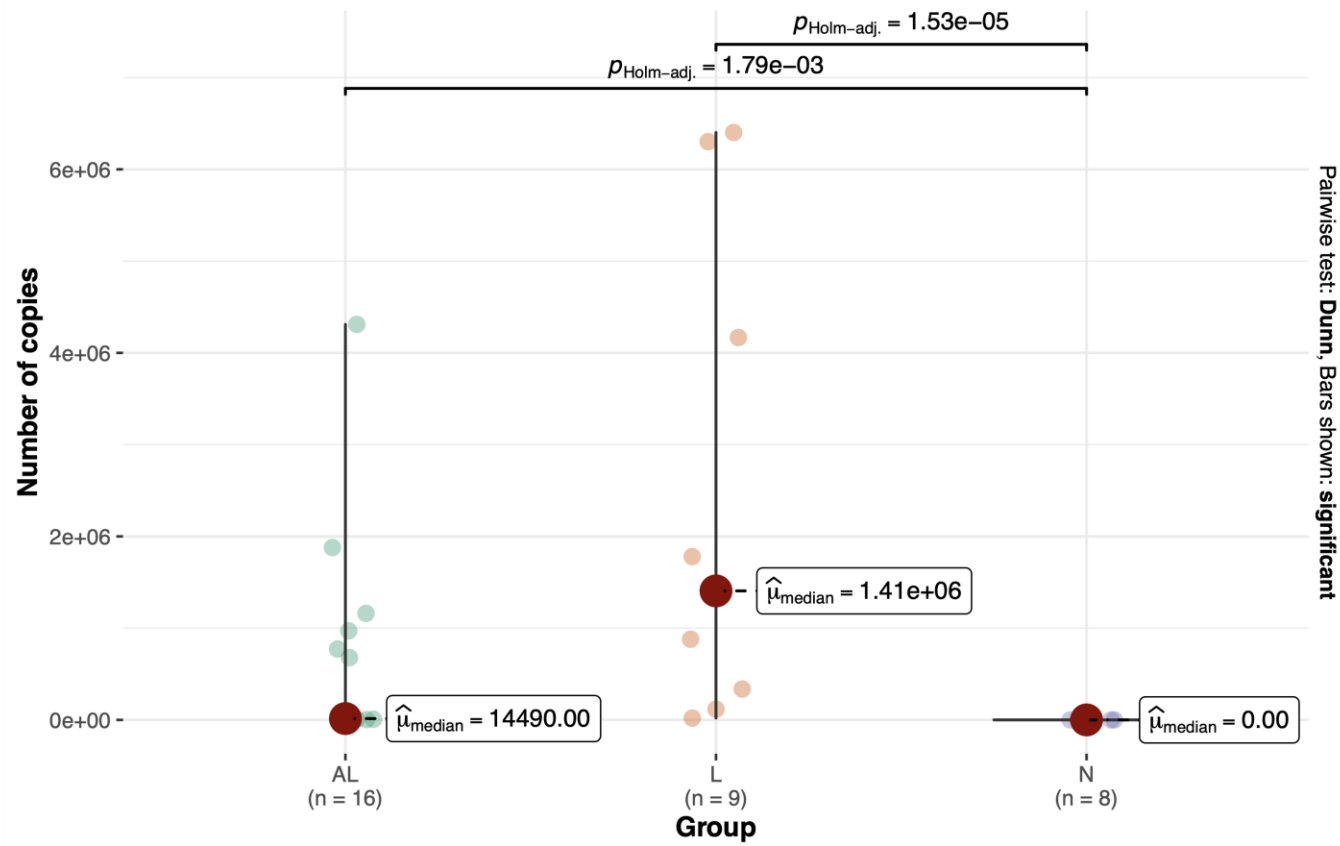

S3  $\chi^2_{\text{Kruskal-Wallis}}(2) = 23.74, p = 7.01\text{e-}06, \hat{\epsilon}^2_{\text{ordinal}} = 0.70, \text{CI}_{99\%} [0.57, 1.00], n_{\text{obs}} = 35$

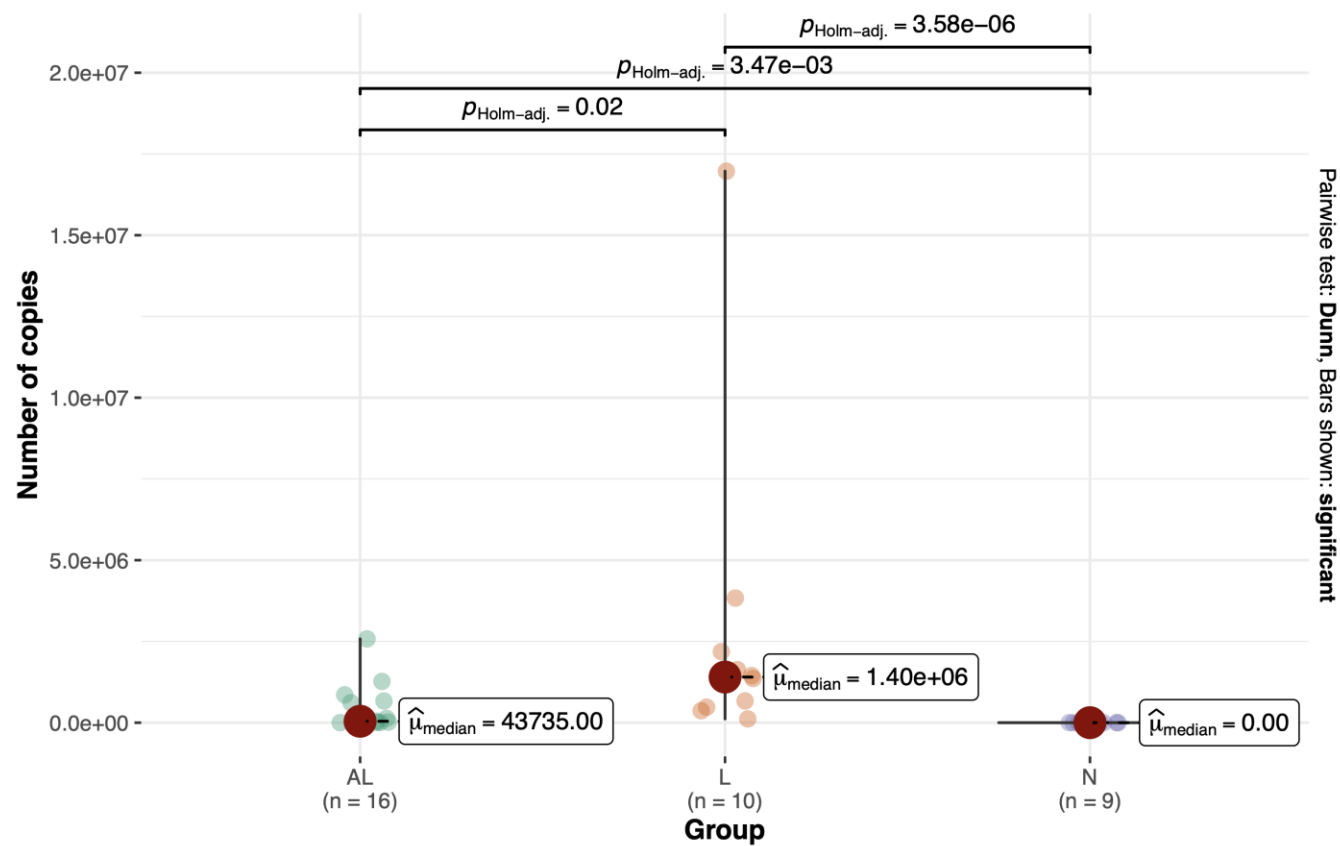

# d. s1

## APOBEC Z1 by group

$\chi^2_{\text{Kruskal-Wallis}}(2) = 9.40, p = 9.11\text{e-}03, \hat{\epsilon}^2_{\text{ordinal}} = 0.29, \text{CI}_{99\%} [0.10, 1.00], n_{\text{obs}} = 33$

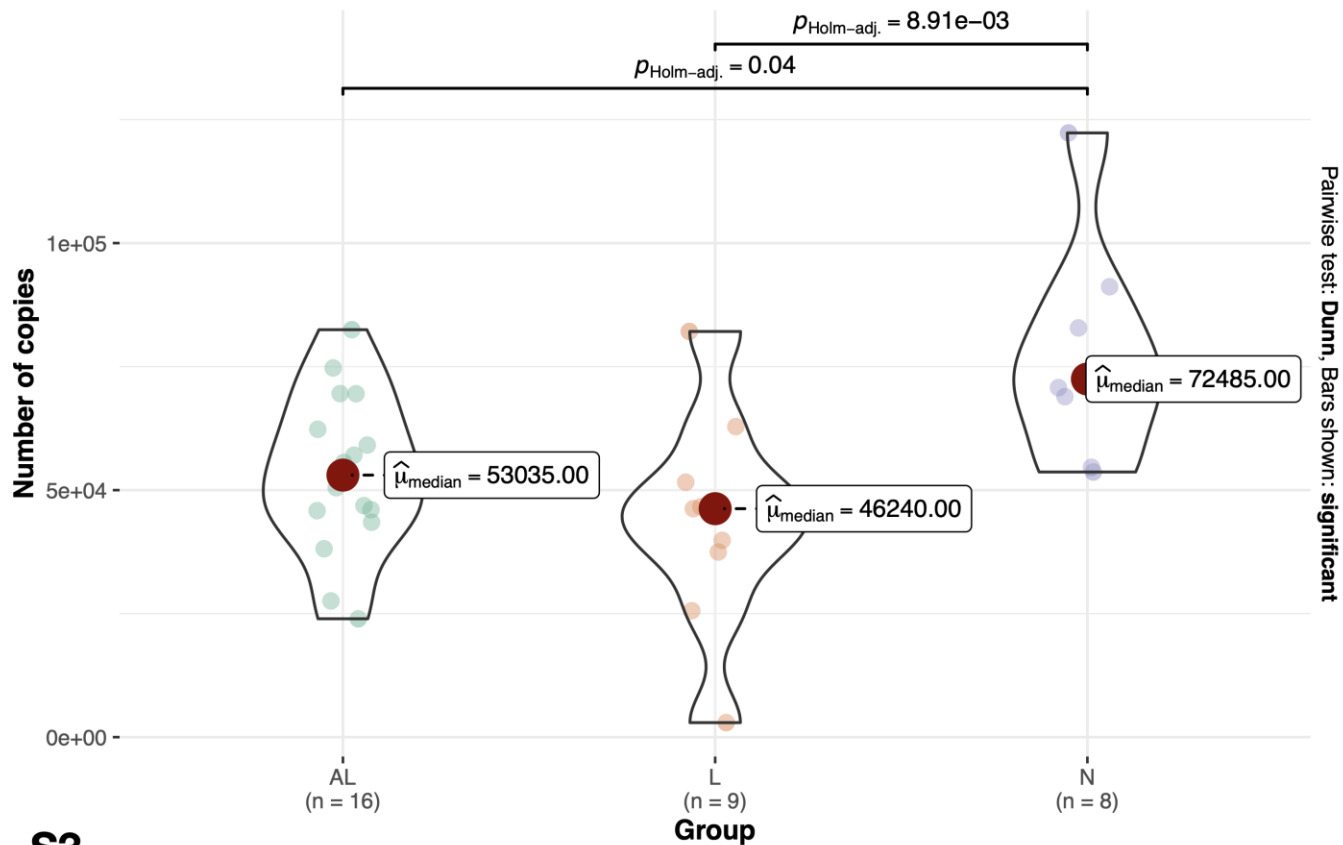

s3

$\chi^2_{\text{Kruskal-Wallis}}(2) = 0.94, p = 0.63, \hat{\epsilon}^2_{\text{ordinal}} = 0.03, \text{CI}_{99\%} [2.07\text{e-}03, 1.00], n_{\text{obs}} = 35$

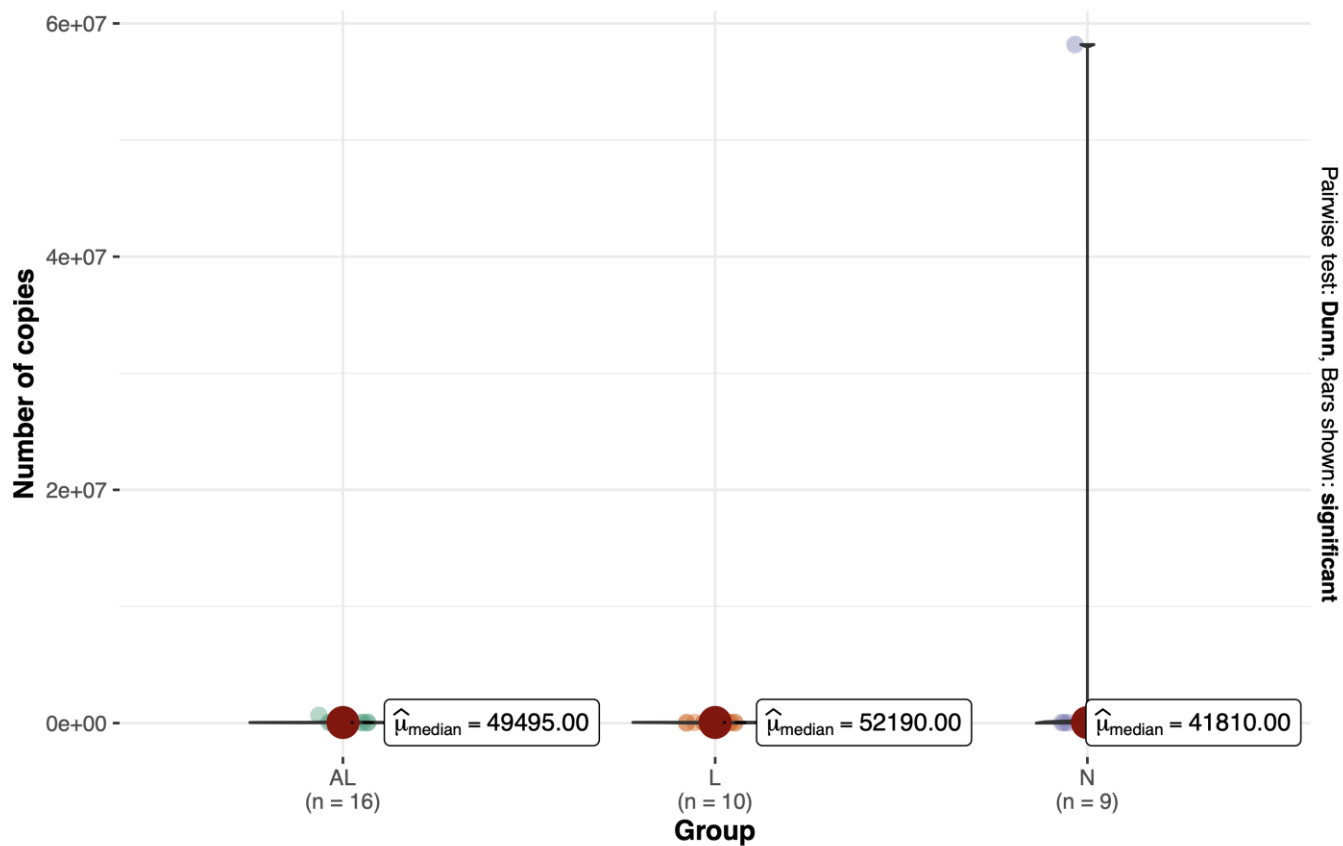

e.

## APOBEC Z2 by group

**S1**  $\chi^2_{\text{Kruskal-Wallis}}(2) = 2.19, p = 0.33, \hat{\epsilon}^2_{\text{ordinal}} = 0.07, \text{CI}_{99\%} [0.03, 1.00], n_{\text{obs}} = 33$

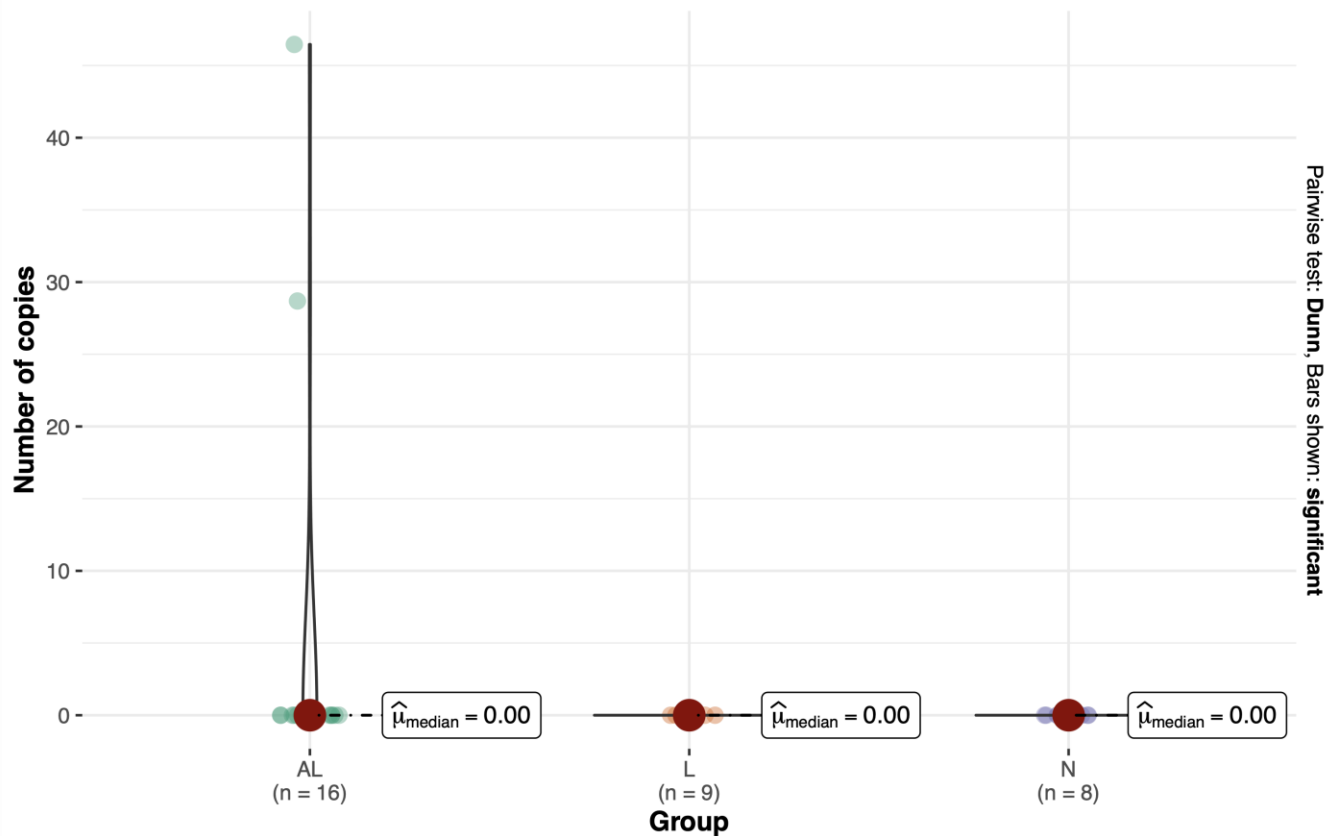

**S3**  $\chi^2_{\text{Kruskal-Wallis}}(2) = 0.83, p = 0.66, \hat{\epsilon}^2_{\text{ordinal}} = 0.02, \text{CI}_{99\%} [0.02, 1.00], n_{\text{obs}} = 35$

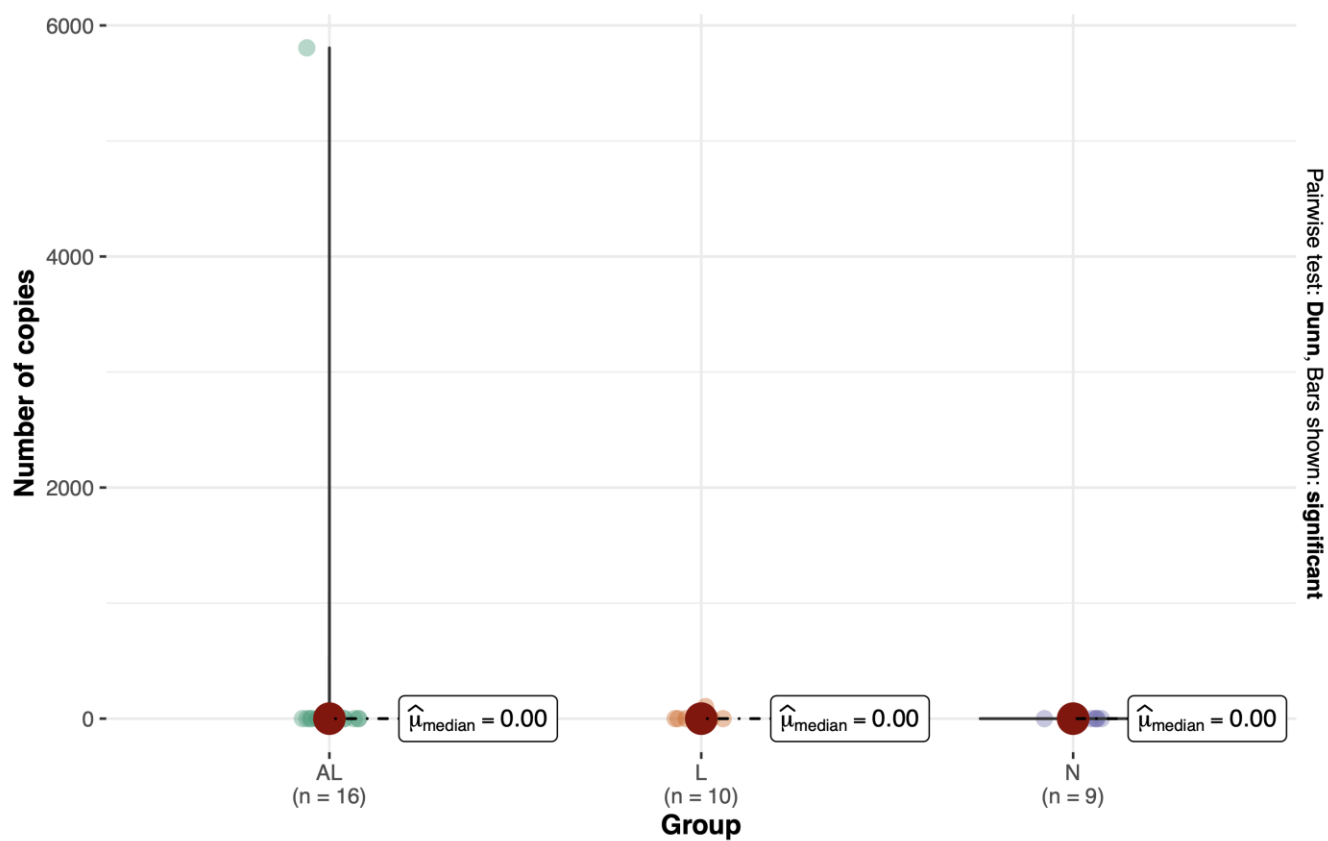

# f. APOBEC Z3 by group

**S1**  $\chi^2_{\text{Kruskal-Wallis}}(2) = 1.13, p = 0.57, \hat{\epsilon}^2_{\text{ordinal}} = 0.04, \text{CI}_{99\%} [4.90\text{e-}04, 1.00], n_{\text{obs}} = 33$

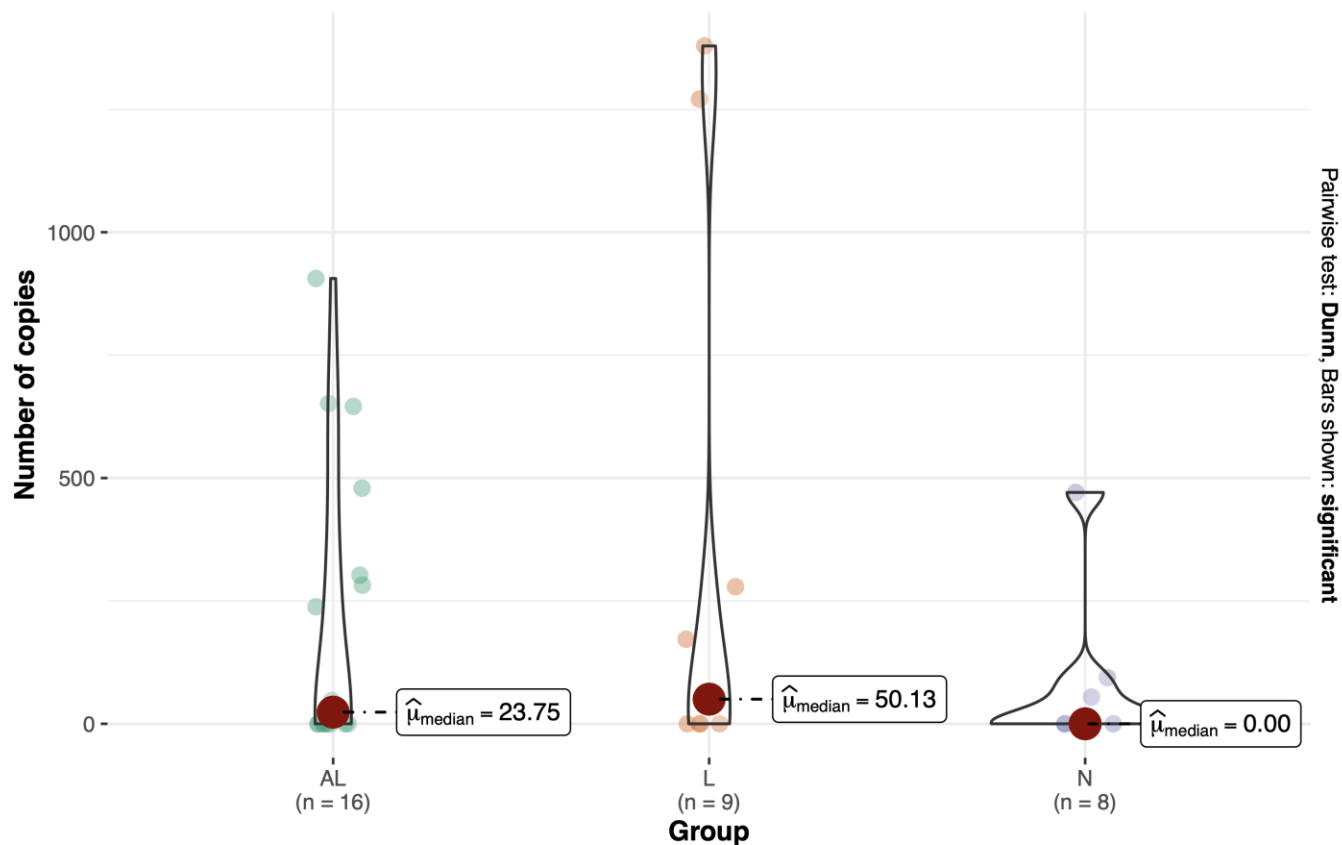

**S3**  $\chi^2_{\text{Kruskal-Wallis}}(2) = 10.60, p = 4.99\text{e-}03, \hat{\epsilon}^2_{\text{ordinal}} = 0.31, \text{CI}_{99\%} [0.06, 1.00], n_{\text{obs}} = 35$

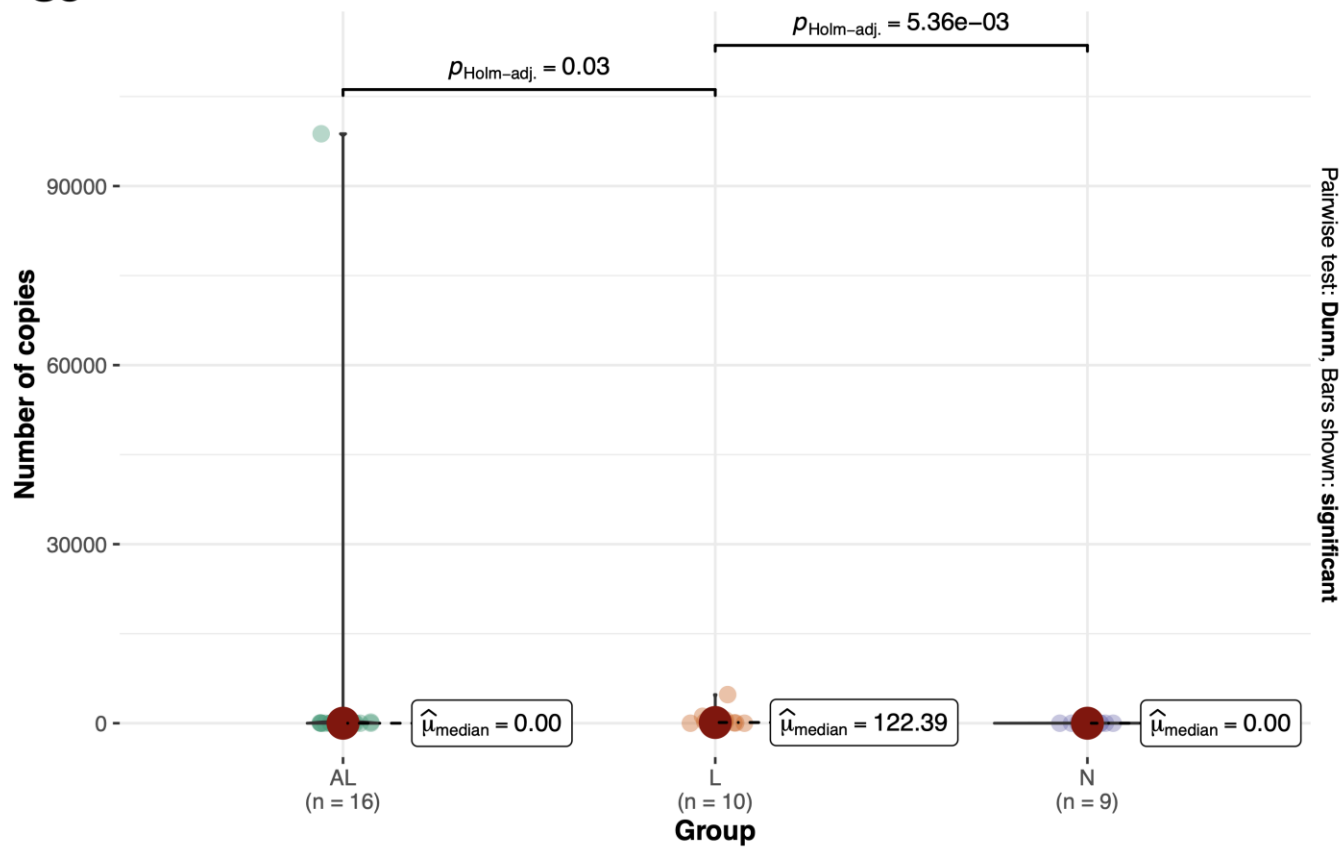

# g. BST2 by group

**S1**  $\chi^2_{\text{Kruskal-Wallis}}(2) = 2.56, p = 0.28, \hat{\epsilon}^2_{\text{ordinal}} = 0.08, \text{CI}_{99\%} [2.00\text{e-}03, 1.00], n_{\text{obs}} = 33$

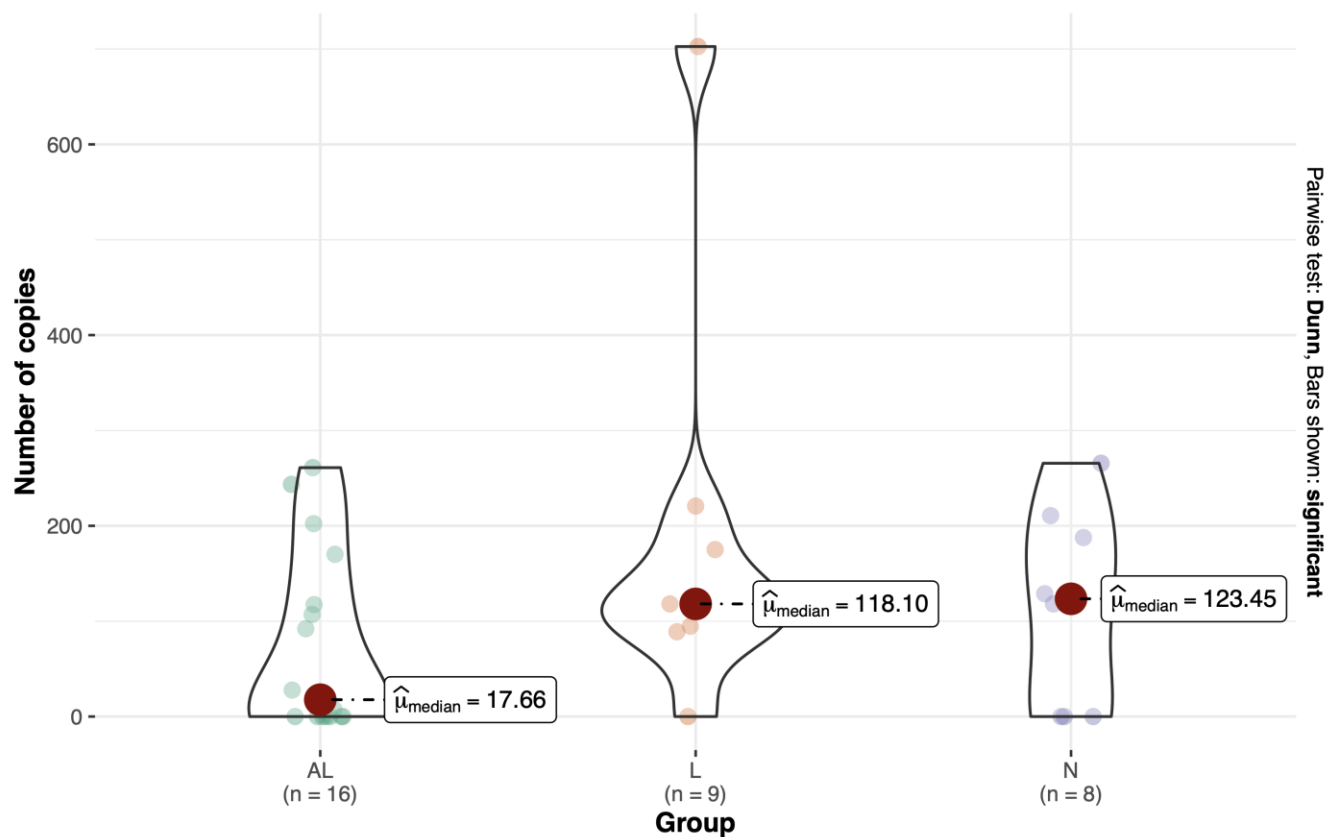

**S3**  $\chi^2_{\text{Kruskal-Wallis}}(2) = 2.07, p = 0.36, \hat{\epsilon}^2_{\text{ordinal}} = 0.06, \text{CI}_{99\%} [2.13\text{e-}03, 1.00], n_{\text{obs}} = 35$

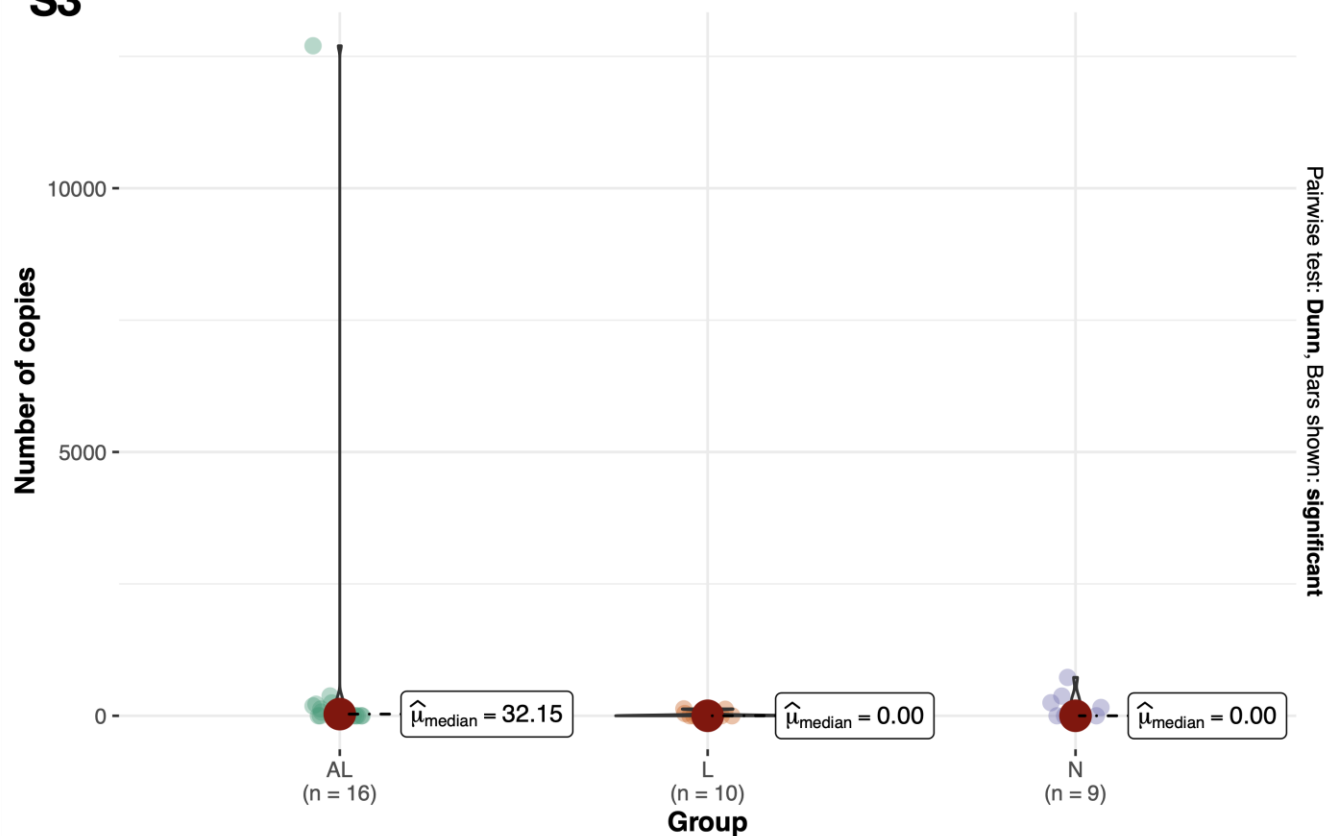

**h.****HEXIM-1 by group****S1**  $\chi^2_{\text{Kruskal-Wallis}}(2) = 1.63, p = 0.44, \hat{\epsilon}^2_{\text{ordinal}} = 0.05, \text{CI}_{99\%} [8.82\text{e-}04, 1.00], n_{\text{obs}} = 33$ 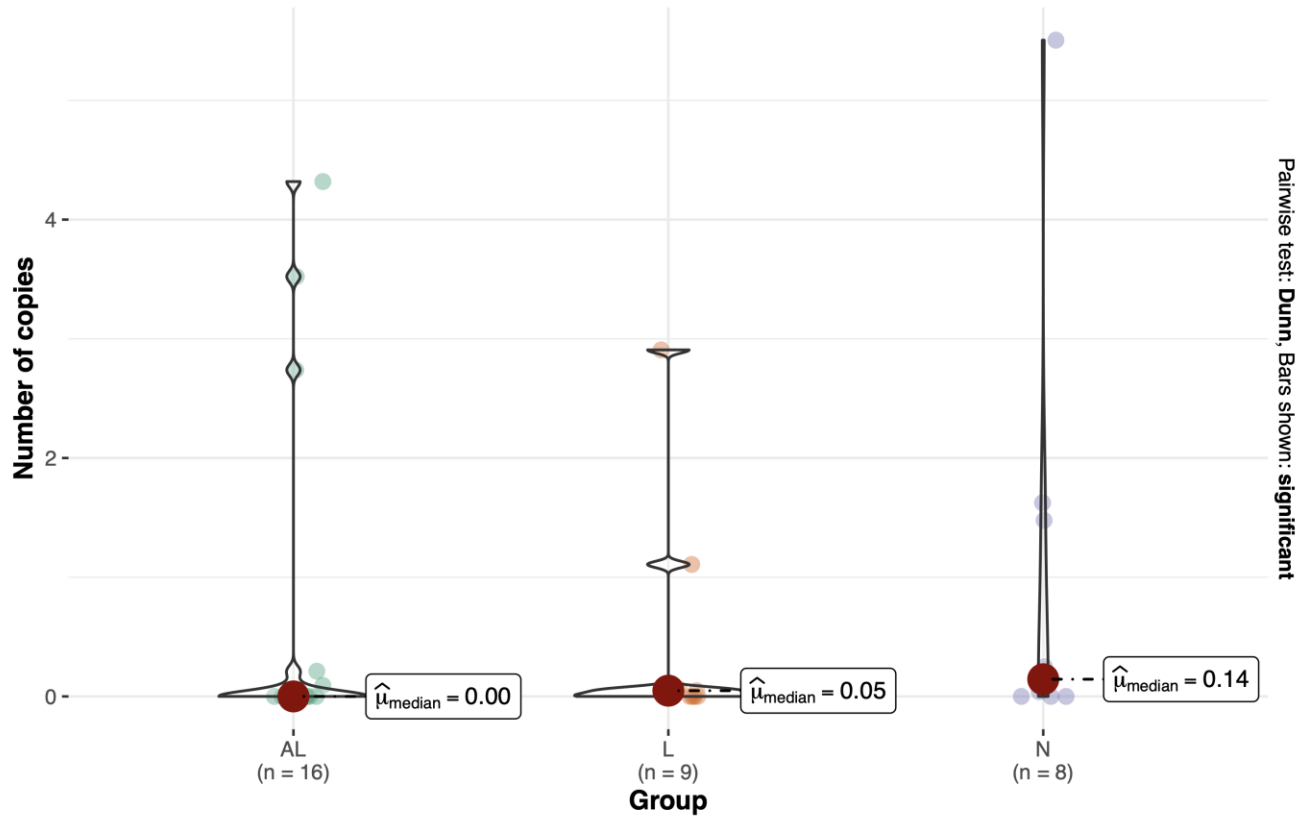**S3**  $\chi^2_{\text{Kruskal-Wallis}}(2) = 0.91, p = 0.64, \hat{\epsilon}^2_{\text{ordinal}} = 0.03, \text{CI}_{99\%} [2.30\text{e-}04, 1.00], n_{\text{obs}} = 35$ 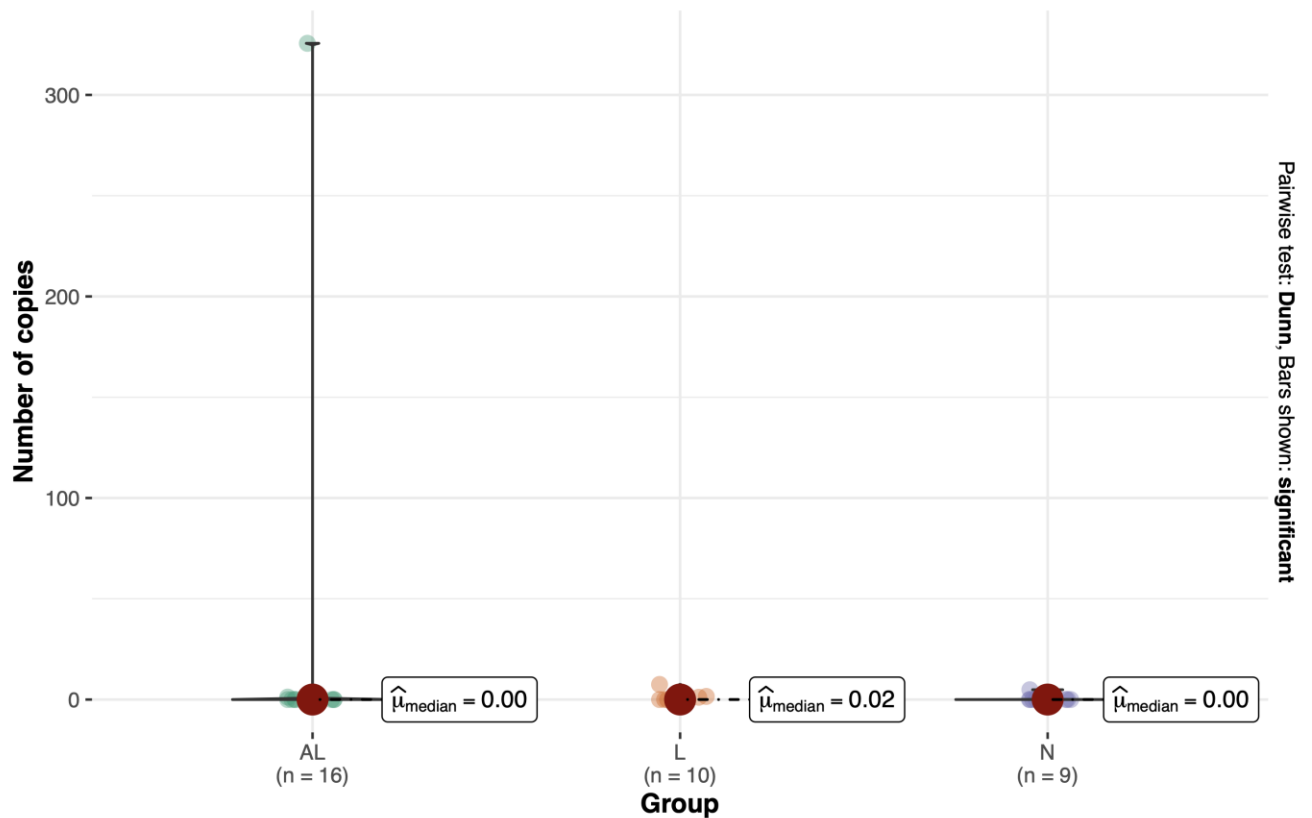



i.

# HEXIM-2 by group

**S1**  $\chi^2_{\text{Kruskal-Wallis}}(2) = 2.36, p = 0.31, \hat{\epsilon}^2_{\text{ordinal}} = 0.07, \text{CI}_{99\%} [3.16\text{e-}05, 1.00], n_{\text{obs}} = 33$

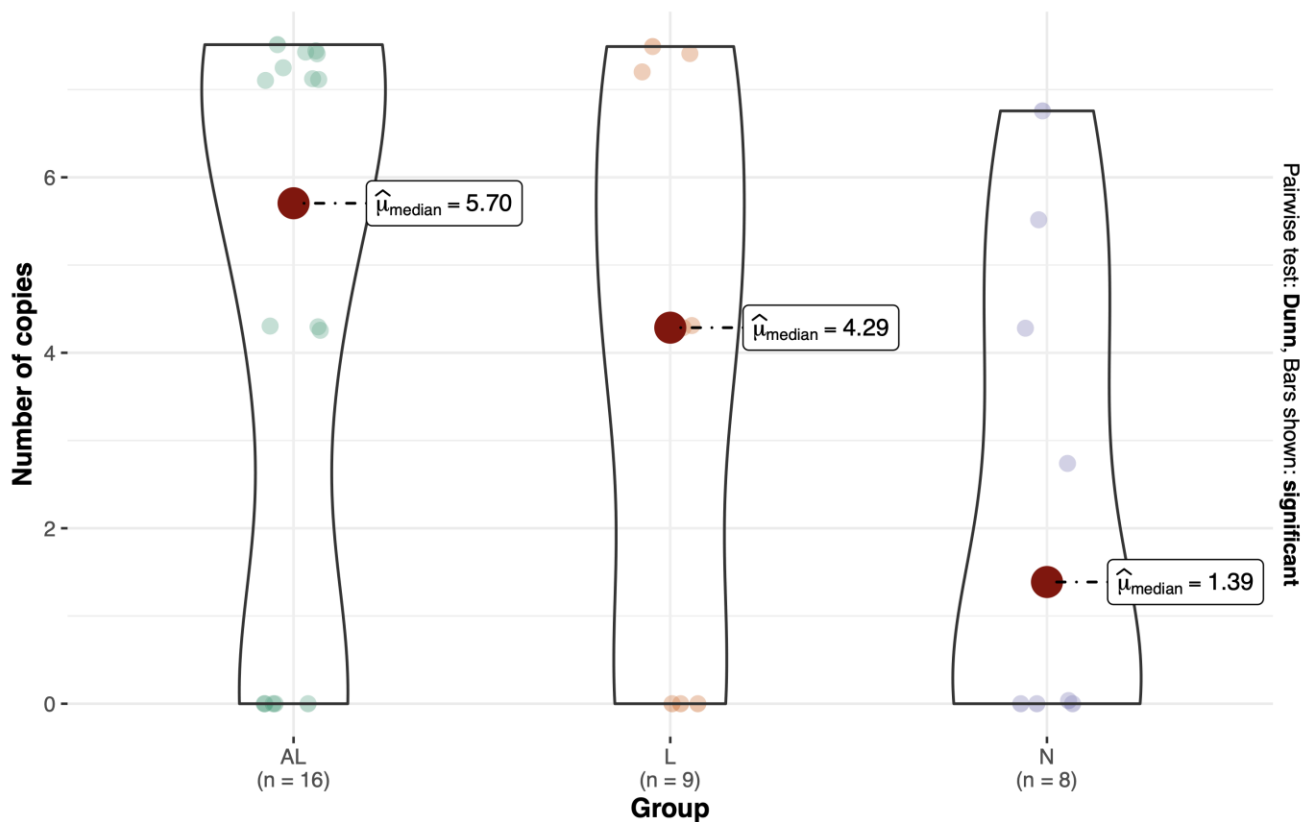

**S3**  $\chi^2_{\text{Kruskal-Wallis}}(2) = 0.79, p = 0.67, \hat{\epsilon}^2_{\text{ordinal}} = 0.02, \text{CI}_{99\%} [6.06\text{e-}03, 1.00], n_{\text{obs}} = 35$

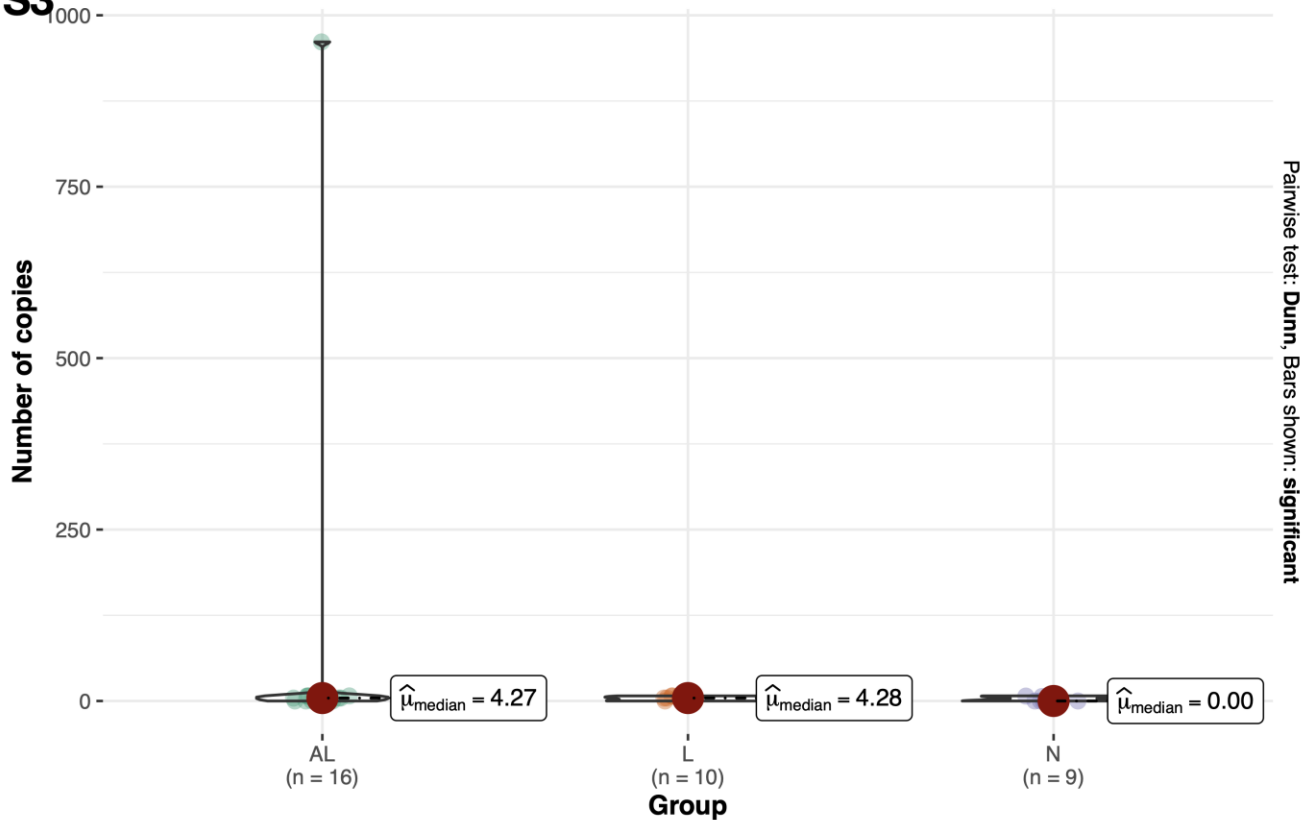

j.

## SAA by group

**S1**  $\chi^2_{\text{Kruskal-Wallis}}(2) = 0.25, p = 0.88, \hat{\epsilon}^2_{\text{ordinal}} = 7.71\text{e-}03, \text{CI}_{99\%} [3.99\text{e-}04, 1.00], n_{\text{obs}} = 33$

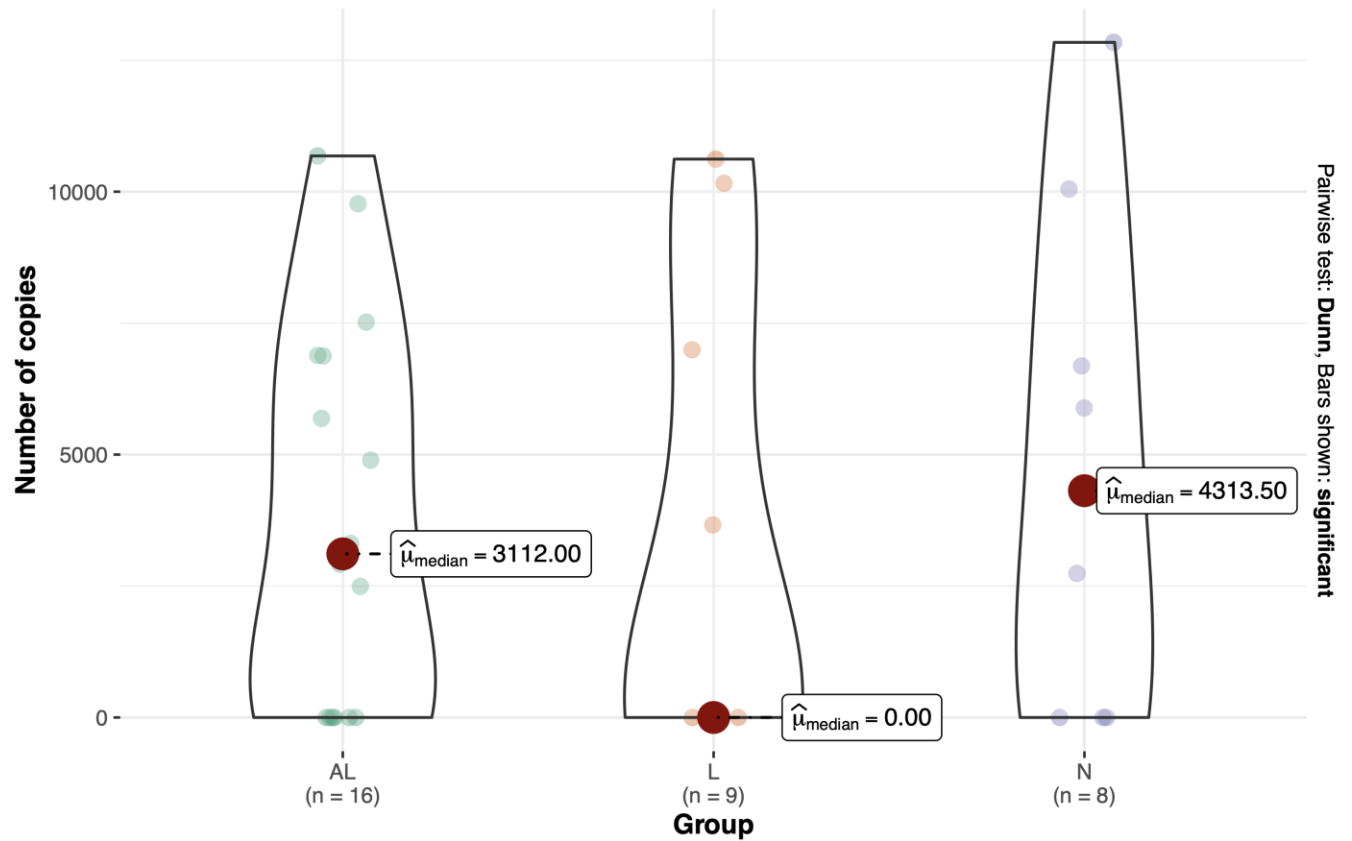

**S3**  $\chi^2_{\text{Kruskal-Wallis}}(2) = 0.52, p = 0.77, \hat{\epsilon}^2_{\text{ordinal}} = 0.02, \text{CI}_{99\%} [1.17\text{e-}03, 1.00], n_{\text{obs}} = 35$

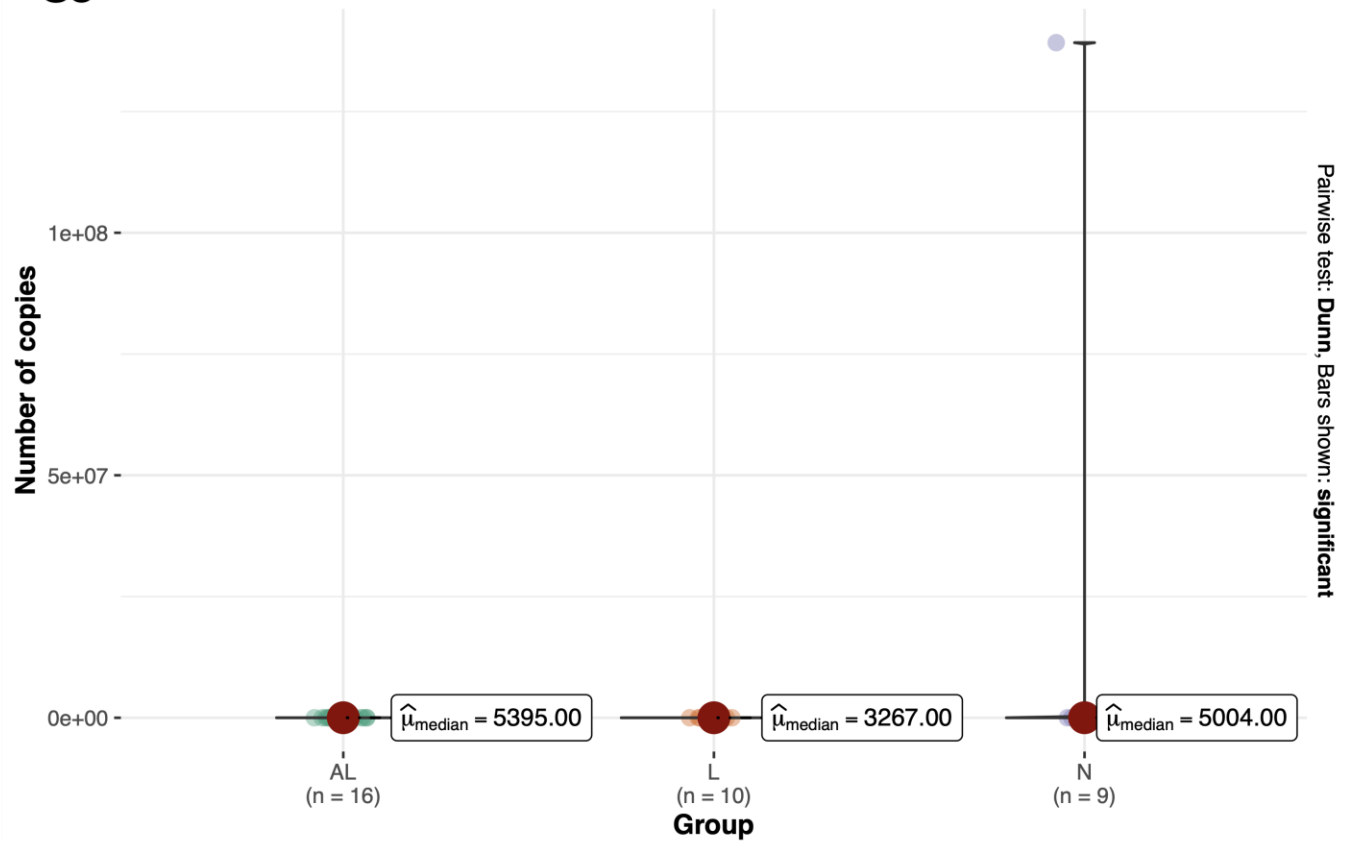

Supplement: s1 [file s1]
