# Supplementary material for: Study of the Genetic Expression of Antiretroviral Restriction Factors and Acute Phase Proteins in Cattle Infected with Bovine Leukemia Virus
Source: MDPI journal article supplement (doi:10.3390/pathogens12040529), 2023-03-29
Supplement: s1 [file s1]

Table S4. Efficiency data of qPCR designed to determine the expression of antiretroviral restriction factors and acute phase proteins.

|           | Slope   | Efficiency | Error | R <sup>2</sup> | Y-Intercept |
|-----------|---------|------------|-------|----------------|-------------|
| APOBEC-Z1 | -3.3989 | 1.97       | 0.11  | 1.00           | 36.41       |
| APOBEC-Z2 | -3.3571 | 1.99       | 0.45  | 1.00           | 36.55       |
| APOBEC-Z3 | -3.8850 | 1.81       | 1.62  | 0.97           | 39.26       |
| BST2      | -3.8721 | 1.81       | 0.78  | 0.99           | 41.62       |
| HEXIM-1   | -3.9204 | 1.80       | 0.71  | 0.99           | 44.54       |
| HEXIM-2   | -3.4921 | 1.93       | 0.31  | 1.00           | 40.69       |
| SAA       | -3.7941 | 1.83       | 0.37  | 0.99           | 43.86       |
| HP        | -3.6320 | 1.89       | 0.81  | 0.98           | 56.14       |
