# Supplementary material for: Study of the Genetic Expression of Antiretroviral Restriction Factors and Acute Phase Proteins in Cattle Infected with Bovine Leukemia Virus
Source: MDPI journal article supplement (doi:10.3390/pathogens12040529), 2023-03-29
Supplement: s1 [file s1]

Table S1. Primers used in PCR techniques to amplify genetic regions of ARF, APP, BRDC virus, BLV proviral, and viral load.

| ID        | Virus     | Sequence (5' - 3')          | Gene      | Amplicon | Tm |
|-----------|-----------|-----------------------------|-----------|----------|----|
| FWA3      | BRSV      | GTACCAATGTCAACCAAATTCC      | N         | 245 bp   | 59 |
| RVA3      |           | TTTGACATCGTAATTGGGTAT       |           |          | 59 |
| FWA2      | BPIV-3    | AAAGGAGTAGTTCAGATTCTAGATG   | M         | 199 bp   | 59 |
| FWA2      |           | ATATAGAGCCAGTTGCGTT         |           |          | 59 |
| FWA1      | BoHV-1    | GCCGTACCACTCCCACGTAT        | gE        | 159 bp   | 59 |
| RV A1     |           | CACGTCTCGTATATGCGGATGA      |           |          | 59 |
| FWA4      | BVDV      | GCTAGCCATGCCCTTAGTAGGACTAGC | 5'NTR     | 293 bp   | 59 |
| Rv A4     |           | AACTCCATGTGCCATGTACAGCAGAG  |           |          | 59 |
| FWA6      | HEXIM-1   | TCTCCCCTTAAGACCCAGGT        | HEXIM-1   | 123 bp   | 55 |
| RV A6     |           | TTTCTTGCCACCTGTCTCT         |           |          | 55 |
| FWA7      | APOBEC-Z1 | CCACATAAGCCTGCACATCC        | APOBEC-Z1 | 114 bp   | 55 |
| RV A7     |           | GTCATGATGGTGATTCGGGC        |           |          | 55 |
| FWA8      | APOBEC-Z2 | AACTCCGCTTCCTGTCTTG         | APOBEC-Z2 | 151 bp   | 55 |
| RV A8     |           | ATGCTCAGCGTCACATTCTG        |           |          | 55 |
| FWA9      | APOBEC-Z3 | TTTAAGATGGGGCTGCAGGA        | APOBEC-Z3 | 162 bp   | 55 |
| RV A9     |           | TGGGACAAGCTGGAGCAATA        |           |          | 55 |
| FWA10     | BST2      | AGTTCCTGATGCCCATAGACA       | BST2      | 195 bp   | 55 |
| RV A10    |           | CCTCCTGACACTCCTTCTGT        |           |          | 55 |
| FWA11     | HEXIM-2   | GAGACTACCTGGATCTGGAGAG      | HEXIM-2   | 113 bp   | 55 |
| RV A11    |           | CAGTTCCTCCACTTGGTAACAG      |           |          | 55 |
| FWA12     | SAA-2     | GGGTGCAGACAAATACTTCC        | SAA-2     | 134 bp   | 55 |
| RV A12    |           | CCTTAAACAGAGGGTCTGTGA       |           |          | 55 |
| FWA13     | HP        | TCCCAGCATAACCTCATCTC        | HP        | 95 bp    | 57 |
| RV A13    |           | TTGTCACTACTGTGACCCA         |           |          | 57 |
| Fw1 env*  | BLV       | GGGTGCGAGAAACCATTCA         | env       | 99 bp    | 62 |
| Rv1 env * | BLV       | GGCGAGAGGTCAAGCATTT         |           |          | 62 |
| Fw2 env** | BLV       | CCAAGGGCTCTGATAAACTC        | env       | 745 bp   | 58 |
| Rv2 env** | BLV       | ATGATGTGACAGAGGGAACC        |           |          | 58 |
| Fw-TBP    | TBP       | AGTCGACGTCCCAGCAG           | TBP       | 112 bp   | 58 |
| Rv-TBP    | TBP       | GAGGGATACAAGGGAGTGGT        | TBP       | 112 bp   | 58 |
| Fw-HPRT1  | HPRT-1    | CGAGATGTGATGAAGGAGATGG      | HPRT-1    | 85 bp    | 58 |
| Rv-HPRT1  | HPRT-1    | ACAGGTCGGCAAAGAACTTAT       | HPRT-1    | 85 bp    | 58 |

ID: identification; Fw: forward; Rv: reverse; BRSV: bovine respiratory syncytial virus; BPIV-3: bovine parainfluenza 3; BoHV-1: bovine herpesvirus type 1; BVDV: bovine diarrhea virus; BLV: bovine leukemia virus; bp: Base pairs. \* primer FW position 6112-6130, Rv position 6192-6211; \*\* Fw position 5852-5871, Rv position 6506-6488, primer position was based on the OIE reference sequence with accession number K02120.
