# Supplementary material for: Study of the Genetic Expression of Antiretroviral Restriction Factors and Acute Phase Proteins in Cattle Infected with Bovine Leukemia Virus
Source: MDPI journal article supplement (doi:10.3390/pathogens12040529), 2023-03-29
Supplement: s1 [file s1]

Table S3a: Means, standard deviations, and correlations with confidence intervals: sampling 1 negative group.

| Variable      | <i>M</i> | <i>SD</i> | 1                     | 2              | 3              | 4                   | 5              | 6                   | 7                  | 8                  | 9                  | 10             |
|---------------|----------|-----------|-----------------------|----------------|----------------|---------------------|----------------|---------------------|--------------------|--------------------|--------------------|----------------|
| 1. Lymphocyte | 3164.78  | 1621.57   |                       |                |                |                     |                |                     |                    |                    |                    |                |
| 2. Proviral   | 0.00     | 0.00      | NA<br>[NA, NA]        |                |                |                     |                |                     |                    |                    |                    |                |
| 3. Viral      | 0.00     | 0.00      | NA<br>[NA, NA]        | NA<br>[NA, NA] |                |                     |                |                     |                    |                    |                    |                |
| 4. Z1         | 77307.50 | 22178.79  | .49<br>[-.33, .89]    | NA<br>[NA, NA] | NA<br>[NA, NA] |                     |                |                     |                    |                    |                    |                |
| 5. Z2         | 0.00     | 0.00      | NA<br>[NA, NA]        | NA<br>[NA, NA] | NA<br>[NA, NA] | NA<br>[NA, NA]      |                |                     |                    |                    |                    |                |
| 6. Z3         | 77.37    | 162.76    | -.16<br>[-.78, .61]   | NA<br>[NA, NA] | NA<br>[NA, NA] | .00<br>[-.70, .71]  | NA<br>[NA, NA] |                     |                    |                    |                    |                |
| 7. BST2       | 113.86   | 104.87    | .33<br>[-.49, .84]    | NA<br>[NA, NA] | NA<br>[NA, NA] | .76*<br>[.13, .95]  | NA<br>[NA, NA] | .00<br>[-.70, .71]  |                    |                    |                    |                |
| 8. HEXIM1     | 1.11     | 1.90      | -.76*<br>[-.95, -.13] | NA<br>[NA, NA] | NA<br>[NA, NA] | -.36<br>[-.85, .46] | NA<br>[NA, NA] | -.11<br>[-.76, .65] | .06<br>[-.67, .73] |                    |                    |                |
| 9. HEXIM2     | 2.42     | 2.81      | .10<br>[-.65, .75]    | NA<br>[NA, NA] | NA<br>[NA, NA] | .08<br>[-.66, .74]  | NA<br>[NA, NA] | .05<br>[-.68, .73]  | .47<br>[-.35, .88] | .45<br>[-.37, .88] |                    |                |
| 10. HP        | 0.00     | 0.00      | NA<br>[NA, NA]        | NA<br>[NA, NA] | NA<br>[NA, NA] | NA<br>[NA, NA]      | NA<br>[NA, NA] | NA<br>[NA, NA]      | NA<br>[NA, NA]     | NA<br>[NA, NA]     | NA<br>[NA, NA]     |                |
| 11. SAA       | 4775.50  | 4932.38   | .07<br>[-.67, .74]    | NA<br>[NA, NA] | NA<br>[NA, NA] | .65<br>[-.10, .93]  | NA<br>[NA, NA] | -.47<br>[-.88, .35] | .37<br>[-.45, .85] | .00<br>[-.70, .71] | .03<br>[-.69, .72] | NA<br>[NA, NA] |

Note. M and SD are used to represent mean and standard deviation, respectively. Values in square brackets indicate the 95% confidence interval for each correlation. The confidence interval is a plausible range of population correlations that could have caused the sample correlation (Cumming, 2014).

\* indicates  $p < .05$ . \*\* indicates  $p < .01$ . NA: not available.

Table S3b: Means, standard deviations, and correlations with confidence intervals: sampling 1 aleukemic group (AL).

| Variable      | <i>M</i>  | <i>SD</i>  | 1                   | 2                   | 3                   | 4                   | 5                   | 6                   | 7                   | 8                   | 9                  | 10             |
|---------------|-----------|------------|---------------------|---------------------|---------------------|---------------------|---------------------|---------------------|---------------------|---------------------|--------------------|----------------|
| 1. Lymphocyte | 4905.39   | 3158.01    |                     |                     |                     |                     |                     |                     |                     |                     |                    |                |
| 2. Proviral   | 616389.01 | 1136645.19 | .06<br>[-.45, .54]  |                     |                     |                     |                     |                     |                     |                     |                    |                |
| 3. Viral      | 837.25    | 1653.54    | .04<br>[-.47, .52]  | .90**<br>[.73, .97] |                     |                     |                     |                     |                     |                     |                    |                |
| 4. Z1         | 53292.50  | 16284.02   | .04<br>[-.46, .53]  | .47<br>[-.03, .78]  | .30<br>[-.23, .69]  |                     |                     |                     |                     |                     |                    |                |
| 5. Z2         | 4.70      | 13.24      | -.21<br>[-.64, .32] | -.08<br>[-.55, .43] | -.19<br>[-.63, .34] | .45<br>[-.06, .77]  |                     |                     |                     |                     |                    |                |
| 6. Z3         | 222.03    | 298.13     | .28<br>[-.25, .68]  | -.12<br>[-.58, .40] | -.20<br>[-.63, .33] | .08<br>[-.43, .56]  | .36<br>[-.16, .73]  |                     |                     |                     |                    |                |
| 7. BST2       | 76.79     | 95.73      | .36<br>[-.16, .73]  | -.24<br>[-.66, .29] | -.21<br>[-.64, .32] | -.12<br>[-.58, .40] | -.02<br>[-.51, .48] | .47<br>[-.03, .79]  |                     |                     |                    |                |
| 8. HEXIM1     | 0.68      | 1.44       | .16<br>[-.37, .61]  | -.23<br>[-.65, .30] | -.22<br>[-.65, .31] | .02<br>[-.48, .51]  | .27<br>[-.26, .67]  | .56*<br>[.09, .83]  | .17<br>[-.36, .61]  |                     |                    |                |
| 9. HEXIM2     | 4.45      | 3.31       | .10<br>[-.42, .57]  | -.22<br>[-.65, .31] | .03<br>[-.47, .52]  | -.37<br>[-.73, .15] | .02<br>[-.48, .51]  | -.18<br>[-.62, .35] | -.04<br>[-.53, .46] | .41<br>[-.11, .75]  |                    |                |
| 10. HP        | 0.00      | 0.00       | NA<br>[NA, NA]      | NA<br>[NA, NA]     |                |
| 11. SAA       | 3814.44   | 3740.99    | -.02<br>[-.51, .48] | -.25<br>[-.66, .28] | -.32<br>[-.70, .21] | -.36<br>[-.72, .17] | .09<br>[-.43, .56]  | .12<br>[-.40, .58]  | .24<br>[-.29, .66]  | -.15<br>[-.60, .38] | .04<br>[-.47, .52] | NA<br>[NA, NA] |

Note. M and SD are used to represent mean and standard deviation, respectively. Values in square brackets indicate the 95% confidence interval for each correlation. The confidence interval is a plausible range of population correlations that could have caused the sample correlation (Cumming, 2014).

\* indicates  $p < .05$ . \*\* indicates  $p < .01$ . NA: not available.

Table S3c: Means, standard deviations, and correlations with confidence intervals: sampling 1 group persistent lymphocytosis (PL).

| Variable      | <i>M</i>   | <i>SD</i>  | 1                   | 2                   | 3                   | 4                  | 5              | 6                   | 7                  | 8                   | 9                  | 10             |
|---------------|------------|------------|---------------------|---------------------|---------------------|--------------------|----------------|---------------------|--------------------|---------------------|--------------------|----------------|
| 1. Lymphocyte | 16535.00   | 5154.02    |                     |                     |                     |                    |                |                     |                    |                     |                    |                |
| 2. Proviral   | 2378893.33 | 2578246.71 | -.14<br>[-.74, .58] |                     |                     |                    |                |                     |                    |                     |                    |                |
| 3. Viral      | 5045.11    | 7205.86    | -.58<br>[-.90, .14] | .41<br>[-.35, .85]  |                     |                    |                |                     |                    |                     |                    |                |
| 4. Z1         | 43920.78   | 22255.57   | -.57<br>[-.89, .16] | -.22<br>[-.77, .52] | .06<br>[-.63, .70]  |                    |                |                     |                    |                     |                    |                |
| 5. Z2         | 0.00       | 0.00       | NA<br>[NA, NA]      | NA<br>[NA, NA]      | NA<br>[NA, NA]      | NA<br>[NA, NA]     |                |                     |                    |                     |                    |                |
| 6. Z3         | 350.10     | 561.67     | -.27<br>[-.79, .48] | -.56<br>[-.89, .17] | -.23<br>[-.78, .51] | .58<br>[-.13, .90] | NA<br>[NA, NA] |                     |                    |                     |                    |                |
| 7. BST2       | 181.92     | 204.37     | -.09<br>[-.71, .61] | -.08<br>[-.71, .62] | .66<br>[.00, .92]   | .17<br>[-.55, .75] | NA<br>[NA, NA] | -.03<br>[-.68, .64] |                    |                     |                    |                |
| 8. HEXIM1     | 0.46       | 0.98       | .21<br>[-.53, .77]  | -.46<br>[-.86, .29] | -.20<br>[-.76, .54] | .09<br>[-.61, .71] | NA<br>[NA, NA] | .15<br>[-.57, .74]  | .04<br>[-.64, .68] |                     |                    |                |
| 9. HEXIM2     | 3.89       | 3.21       | -.36<br>[-.82, .40] | .60<br>[-.11, .90]  | .68*<br>[.04, .93]  | .03<br>[-.65, .68] | NA<br>[NA, NA] | -.31<br>[-.81, .44] | .34<br>[-.42, .82] | -.61<br>[-.91, .09] |                    |                |
| 10. HP        | 0.00       | 0.00       | NA<br>[NA, NA]      | NA<br>[NA, NA]      | NA<br>[NA, NA]      | NA<br>[NA, NA]     | NA<br>[NA, NA] | NA<br>[NA, NA]      | NA<br>[NA, NA]     | NA<br>[NA, NA]      | NA<br>[NA, NA]     |                |
| 11. SAA       | 3492.78    | 4589.76    | -.07<br>[-.70, .62] | .19<br>[-.54, .76]  | .09<br>[-.61, .71]  | .12<br>[-.59, .73] | NA<br>[NA, NA] | -.44<br>[-.85, .32] | .24<br>[-.51, .78] | -.39<br>[-.84, .37] | .16<br>[-.56, .75] | NA<br>[NA, NA] |

Note. M and SD are used to represent mean and standard deviation, respectively. Values in square brackets indicate the 95% confidence interval for each correlation. The confidence interval is a plausible range of population correlations that could have caused the sample correlation (Cumming, 2014).

\* indicates  $p < .05$ . \*\* indicates  $p < .01$ . NA: not available.

Table S3d: Means, standard deviations, and correlations with confidence intervals: sampling 3 negative group.

| Variable      | <i>M</i>    | <i>SD</i>   | 1                  | 2              | 3              | 4                      | 5              | 6                   | 7                   | 8                   | 9                   | 10             |
|---------------|-------------|-------------|--------------------|----------------|----------------|------------------------|----------------|---------------------|---------------------|---------------------|---------------------|----------------|
| 1. Lymphocyte | 5359.67     | 1223.49     |                    |                |                |                        |                |                     |                     |                     |                     |                |
| 2. Proviral   | 0.00        | 0.00        | NA<br>[NA, NA]     |                |                |                        |                |                     |                     |                     |                     |                |
| 3. Viral      | 0.00        | 0.00        | NA<br>[NA, NA]     | NA<br>[NA, NA] |                |                        |                |                     |                     |                     |                     |                |
| 4. Z1         | 6504834.44  | 19381955.65 | .04<br>[-.64, .69] | NA<br>[NA, NA] | NA<br>[NA, NA] |                        |                |                     |                     |                     |                     |                |
| 5. Z2         | 0.00        | 0.00        | NA<br>[NA, NA]     | NA<br>[NA, NA] | NA<br>[NA, NA] | NA<br>[NA, NA]         |                |                     |                     |                     |                     |                |
| 6. Z3         | 7.64        | 22.92       | .77*<br>[.23, .95] | NA<br>[NA, NA] | NA<br>[NA, NA] | -.12<br>[-.73, .59]    | NA<br>[NA, NA] |                     |                     |                     |                     |                |
| 7. BST2       | 167.41      | 250.72      | .47<br>[-.28, .86] | NA<br>[NA, NA] | NA<br>[NA, NA] | -.25<br>[-.78, .50]    | NA<br>[NA, NA] | .31<br>[-.45, .81]  |                     |                     |                     |                |
| 8. HEXIM1     | 0.55        | 1.62        | .16<br>[-.56, .74] | NA<br>[NA, NA] | NA<br>[NA, NA] | -.11<br>[-.72, .59]    | NA<br>[NA, NA] | -.13<br>[-.73, .59] | .83**<br>[.38, .96] |                     |                     |                |
| 9. HEXIM2     | 3.14        | 3.73        | .47<br>[-.28, .86] | NA<br>[NA, NA] | NA<br>[NA, NA] | -.32<br>[-.81, .44]    | NA<br>[NA, NA] | .40<br>[-.36, .84]  | -.12<br>[-.73, .59] | -.32<br>[-.81, .43] |                     |                |
| 10. HP        | 0.00        | 0.00        | NA<br>[NA, NA]     | NA<br>[NA, NA] | NA<br>[NA, NA] | NA<br>[NA, NA]         | NA<br>[NA, NA] | NA<br>[NA, NA]      | NA<br>[NA, NA]      | NA<br>[NA, NA]      | NA<br>[NA, NA]      |                |
| 11. SAA       | 15472451.06 | 46397831.76 | .04<br>[-.64, .69] | NA<br>[NA, NA] | NA<br>[NA, NA] | 1.00**<br>[1.00, 1.00] | NA<br>[NA, NA] | -.13<br>[-.73, .59] | -.25<br>[-.78, .50] | -.11<br>[-.72, .59] | -.32<br>[-.81, .44] | NA<br>[NA, NA] |

Note. M and SD are used to represent mean and standard deviation, respectively. Values in square brackets indicate the 95% confidence interval for each correlation. The confidence interval is a plausible range of population correlations that could have caused the sample correlation (Cumming, 2014).

\* indicates  $p < .05$ . \*\* indicates  $p < .01$ . NA: not available.

Table S3e. Means, standard deviations, and correlations with confidence intervals: sampling 3 aleukemic group (AL).

| Variable                | M         | SD        | 1                  | 2                   | 3                   | 4                     | 5                      | 6                      | 7                      | 8                      | 9                      | 10                  |
|-------------------------|-----------|-----------|--------------------|---------------------|---------------------|-----------------------|------------------------|------------------------|------------------------|------------------------|------------------------|---------------------|
| 1. Lymphocyte           | 7566.19   | 2596.64   |                    |                     |                     |                       |                        |                        |                        |                        |                        |                     |
| 2. Proviral             | 402277.00 | 696725.51 | .48<br>[-.02, .79] |                     |                     |                       |                        |                        |                        |                        |                        |                     |
| 3. Viral                | 8123.06   | 14127.92  | .41<br>[-.10, .76] | .96**<br>[.90, .99] |                     |                       |                        |                        |                        |                        |                        |                     |
| 4. Z1                   | 91033.12  | 153826.40 | .24<br>[-.29, .66] | .09<br>[-.43, .56]  | .01<br>[-.49, .50]  |                       |                        |                        |                        |                        |                        |                     |
| 5. Z2                   | 362.88    | 1451.50   | .22<br>[-.31, .65] | .08<br>[-.43, .55]  | -.02<br>[-.51, .48] | .99**<br>[.98, 1.00]  |                        |                        |                        |                        |                        |                     |
| 6. Z3                   | 6197.56   | 24683.37  | .22<br>[-.31, .65] | .08<br>[-.43, .56]  | -.02<br>[-.51, .48] | .99**<br>[.98, 1.00]  | 1.00**<br>[1.00, 1.00] |                        |                        |                        |                        |                     |
| 7. BST2                 | 874.32    | 3155.61   | .23<br>[-.30, .65] | .09<br>[-.43, .56]  | -.01<br>[-.50, .49] | 1.00**<br>[.99, 1.00] | 1.00**<br>[1.00, 1.00] | 1.00**<br>[1.00, 1.00] |                        |                        |                        |                     |
| 8. HEXIM1               | 20.53     | 81.35     | .22<br>[-.31, .65] | .08<br>[-.43, .55]  | -.02<br>[-.51, .48] | .99**<br>[.98, 1.00]  | 1.00**<br>[1.00, 1.00] | 1.00**<br>[1.00, 1.00] | 1.00**<br>[1.00, 1.00] |                        |                        |                     |
| 9. HEXIM2               | 63.66     | 239.35    | .23<br>[-.30, .65] | .09<br>[-.43, .56]  | -.01<br>[-.50, .49] | .99**<br>[.98, 1.00]  | 1.00**<br>[1.00, 1.00] | 1.00**<br>[1.00, 1.00] | 1.00**<br>[1.00, 1.00] | 1.00**<br>[1.00, 1.00] |                        |                     |
| 10. HP <sup>&amp;</sup> | 1744.38   | 6977.50   | .15<br>[-.37, .60] | .83**<br>[.57, .94] | .82**<br>[.56, .94] | -.06<br>[-.54, .45]   | -.07<br>[-.54, .44]    | -.07<br>[-.54, .44]    | -.05<br>[-.53, .45]    | -.07<br>[-.54, .44]    | -.06<br>[-.54, .45]    |                     |
| 11. SAA                 | 42266.75  | 149198.29 | .23<br>[-.30, .65] | .08<br>[-.43, .55]  | -.02<br>[-.51, .48] | .99**<br>[.98, 1.00]  | 1.00**<br>[1.00, 1.00] | 1.00**<br>[1.00, 1.00] | 1.00**<br>[1.00, 1.00] | 1.00**<br>[1.00, 1.00] | 1.00**<br>[1.00, 1.00] | -.08<br>[-.55, .44] |

Note. M and SD are used to represent mean and standard deviation, respectively. Values in square brackets indicate the 95% confidence interval for each correlation. The confidence interval is a plausible range of population correlations that could have caused the sample correlation (Cumming, 2014).

\* indicates  $p < .05$ . \*\* indicates  $p < .01$ . NA: not available. &: determination carried out in a single bovine.

Table S3f. Means, standard deviations, and correlations with confidence intervals: sampling 3 group persistent lymphocytosis (PL).

| Variable      | <i>M</i>   | <i>SD</i>  | 1                   | 2                   | 3                   | 4                   | 5                   | 6                   | 7                  | 8                  | 9                  | 10             |
|---------------|------------|------------|---------------------|---------------------|---------------------|---------------------|---------------------|---------------------|--------------------|--------------------|--------------------|----------------|
| 1. Lymphocyte | 18931.60   | 6338.98    |                     |                     |                     |                     |                     |                     |                    |                    |                    |                |
| 2. Proviral   | 2905680.00 | 5060288.29 | .42<br>[-.29, .83]  |                     |                     |                     |                     |                     |                    |                    |                    |                |
| 3. Viral      | 48980.50   | 47596.10   | .63<br>[-.00, .90]  | .76*<br>[.25, .94]  |                     |                     |                     |                     |                    |                    |                    |                |
| 4. Z1         | 43547.00   | 22684.39   | -.04<br>[-.65, .61] | .10<br>[-.57, .68]  | .24<br>[-.46, .75]  |                     |                     |                     |                    |                    |                    |                |
| 5. Z2         | 10.42      | 32.95      | -.27<br>[-.77, .44] | -.17<br>[-.72, .52] | -.25<br>[-.76, .45] | -.41<br>[-.83, .29] |                     |                     |                    |                    |                    |                |
| 6. Z3         | 713.56     | 1478.42    | .31<br>[-.40, .78]  | -.09<br>[-.68, .57] | -.26<br>[-.77, .44] | -.58<br>[-.89, .07] | -.17<br>[-.72, .52] |                     |                    |                    |                    |                |
| 7. BST2       | 29.84      | 53.21      | -.23<br>[-.75, .47] | -.25<br>[-.76, .45] | -.29<br>[-.78, .42] | -.41<br>[-.83, .29] | .62<br>[-.02, .90]  | -.30<br>[-.78, .41] |                    |                    |                    |                |
| 8. HEXIM1     | 1.14       | 2.32       | -.15<br>[-.71, .53] | -.23<br>[-.75, .47] | -.31<br>[-.79, .39] | -.48<br>[-.85, .21] | .96**<br>[.85, .99] | .04<br>[-.60, .66]  | .53<br>[-.15, .87] |                    |                    |                |
| 9. HEXIM2     | 3.48       | 3.24       | -.04<br>[-.65, .61] | .04<br>[-.60, .65]  | -.00<br>[-.63, .63] | -.39<br>[-.82, .32] | .09<br>[-.57, .68]  | .29<br>[-.42, .78]  | .27<br>[-.43, .77] | .06<br>[-.59, .67] |                    |                |
| 10. HP        | 0.00       | 0.00       | NA<br>[NA, NA]      | NA<br>[NA, NA]     | NA<br>[NA, NA]     | NA<br>[NA, NA]     |                |
| 11. SAA       | 4232.30    | 4169.27    | -.39<br>[-.82, .31] | .12<br>[-.55, .69]  | -.06<br>[-.67, .59] | -.32<br>[-.79, .38] | .78**<br>[.28, .94] | -.20<br>[-.74, .49] | .27<br>[-.43, .77] | .67*<br>[.06, .91] | .16<br>[-.52, .72] | NA<br>[NA, NA] |

Note. M and SD are used to represent mean and standard deviation, respectively. Values in square brackets indicate the 95% confidence interval for each correlation. The confidence interval is a plausible range of population correlations that could have caused the sample correlation (Cumming, 2014).

\* indicates  $p < .05$ . \*\* indicates  $p < .01$ . NA: not available.
