# Supplementary material for: Study of the Genetic Expression of Antiretroviral Restriction Factors and Acute Phase Proteins in Cattle Infected with Bovine Leukemia Virus
Source: MDPI journal article supplement (doi:10.3390/pathogens12040529), 2023-03-29
Supplement: s1 [file s1]

Table S2. Results of the shapiro-wilk test to determine normality, and the Bartlett test to determine the homoscedasticity of the samples.

|                  |                       | shapiro-wilk |           | Bartlett |            |
|------------------|-----------------------|--------------|-----------|----------|------------|
|                  |                       | W            | p-value   | K-squire | p-value    |
| Number of copies | Number of lymphocytes | 0.86718      | 3.233e-06 | 21.739   | 1.903 e-05 |
|                  | Provirus              | 0.44121      | 1.175e-14 | Inf      | < 2.2e-16  |
|                  | Virus                 | 0.45532      | 1.805e-14 | Inf      | < 2.2e-16  |
|                  | APOBEC-Z1             | 0.10377      | < 2.2e-16 | 433.36   | < 2.2e-16  |
|                  | APOBEC-Z2             | 0.1049       | < 2.2e-16 | Inf      | < 2.2e-16  |
|                  | APOBEC-Z3             | 0.11865      | < 2.2e-16 | 206.81   | < 2.2e-16  |
|                  | BST2                  | 0.15117      | < 2.2e-16 | 122.59   | < 2.2e-16  |
|                  | HEXIM-1               | 0.11591      | < 2.2e-16 | 184.74   | < 2.2e-16  |
|                  | HEXIM-2               | 0.11549      | < 2.2e-16 | 217.05   | < 2.2e-16  |
|                  | SAA                   | 0.10111      | < 2.2e-16 | 576.62   | < 2.2e-16  |
|                  | HP                    | 0.10028      | < 2.2e-16 | Inf      | < 2.2e-16  |

W= Shapiro-Wilk normality test value

K-square= value of Bartlett's test for homogeneity of variances
