# Supplementary figures and images for: Study of the Genetic Expression of Antiretroviral Restriction Factors and Acute Phase Proteins in Cattle Infected with Bovine Leukemia Virus
Source: MDPI journal article supplement (doi:10.3390/pathogens12040529), 2023-03-29

Figure S1

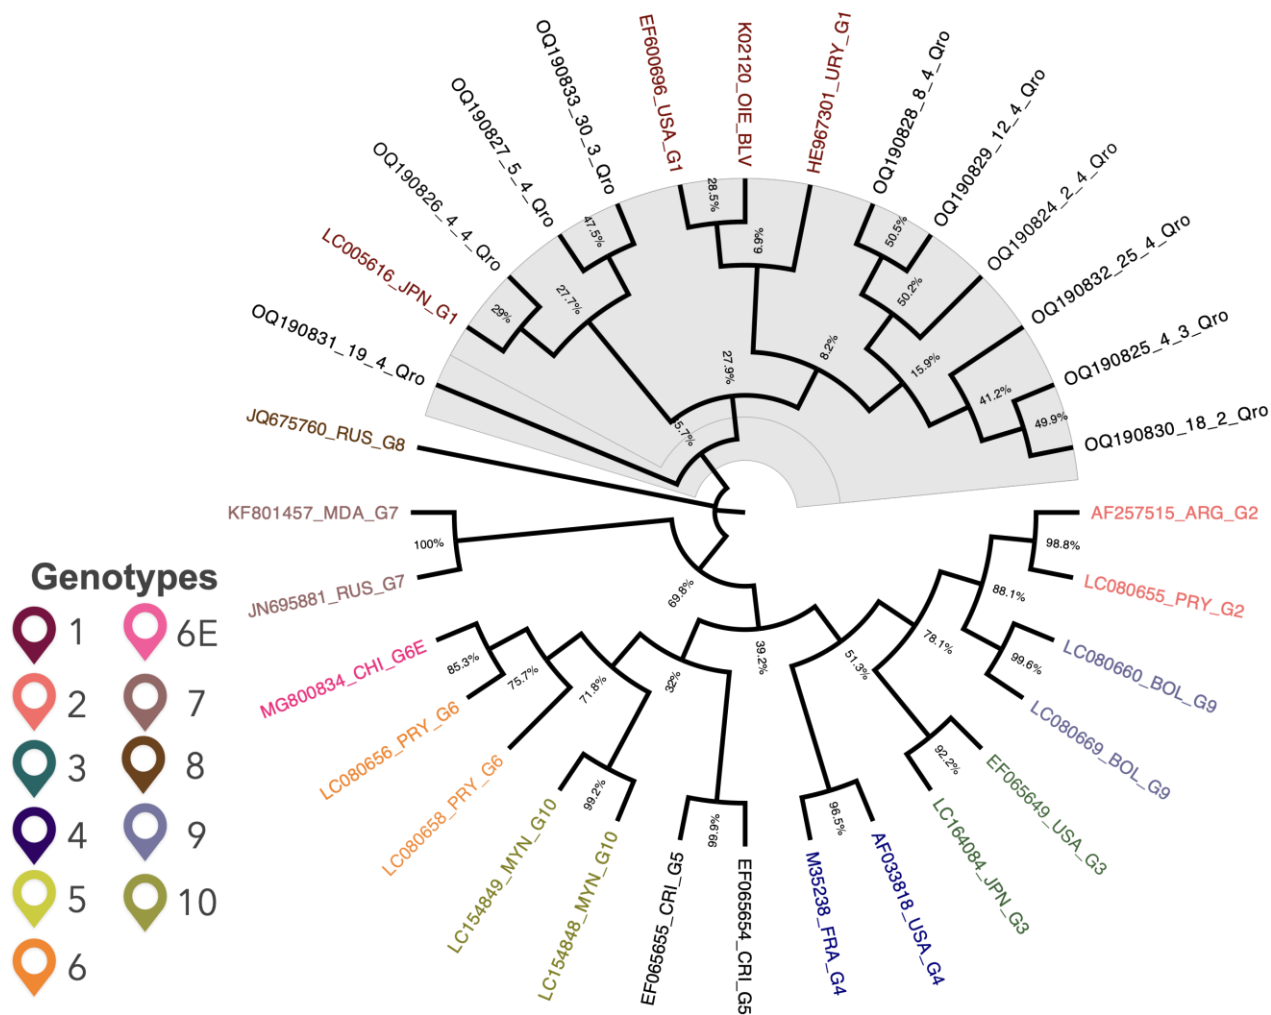

Supplement: s1 [file s1]
